# Supplementary material for: In Silico Screening and Optimization of Cell-Penetrating Peptides Using Deep Learning Methods
Source: MDPI journal article supplement (doi:10.3390/biom13030522), 2023-03-13
Supplement: s1 [file s1]

# Supplementary information

**Model 1**

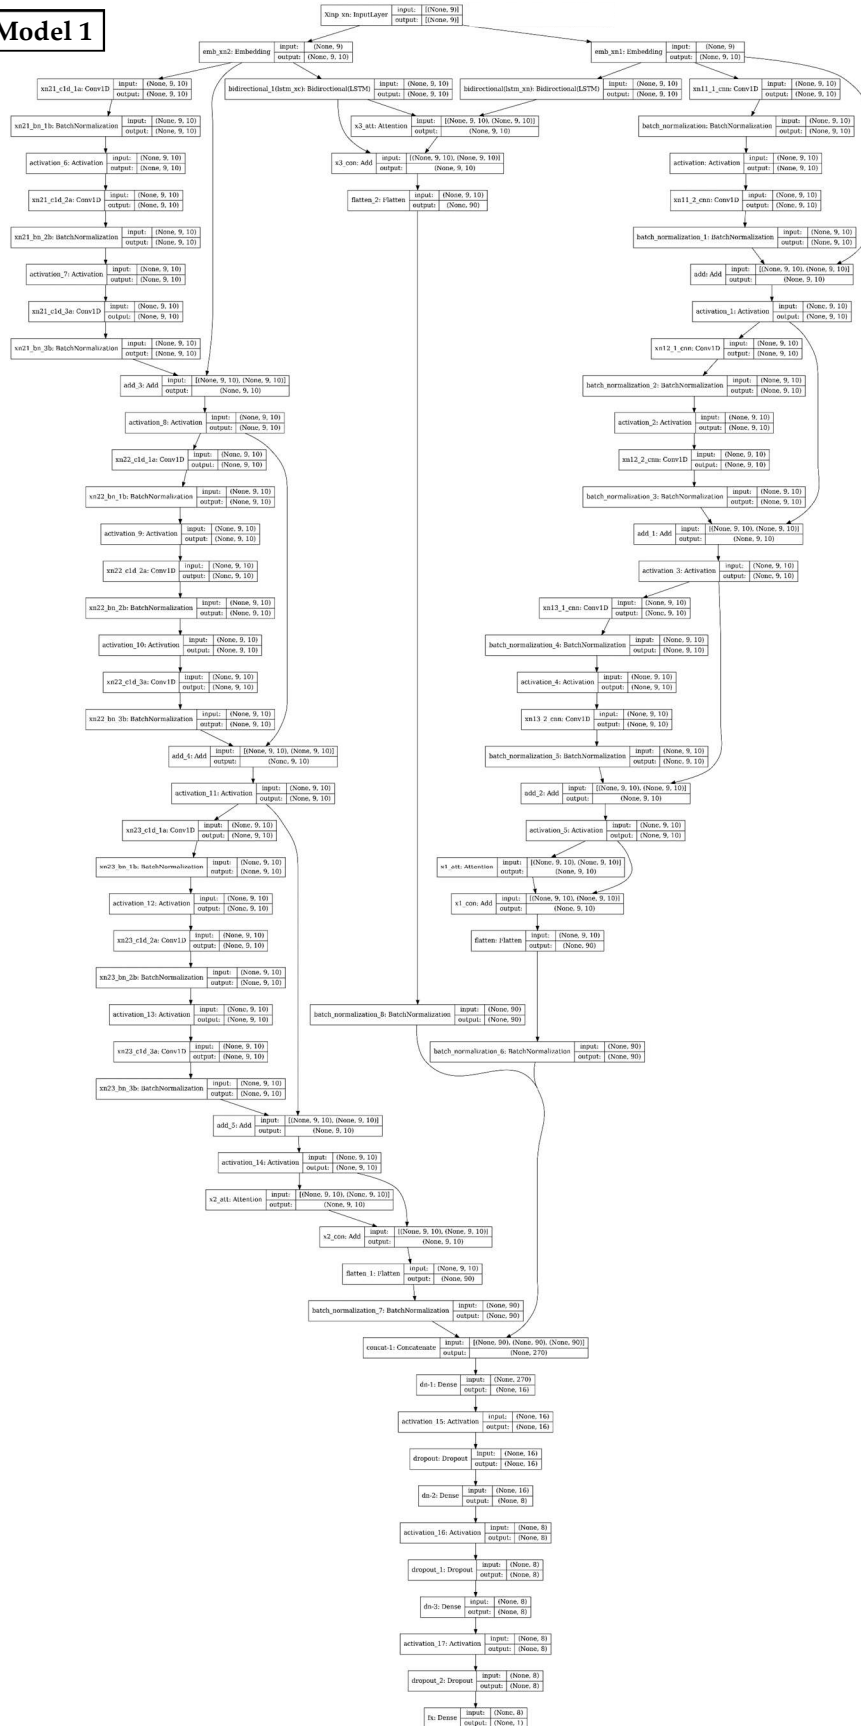

## Model 2

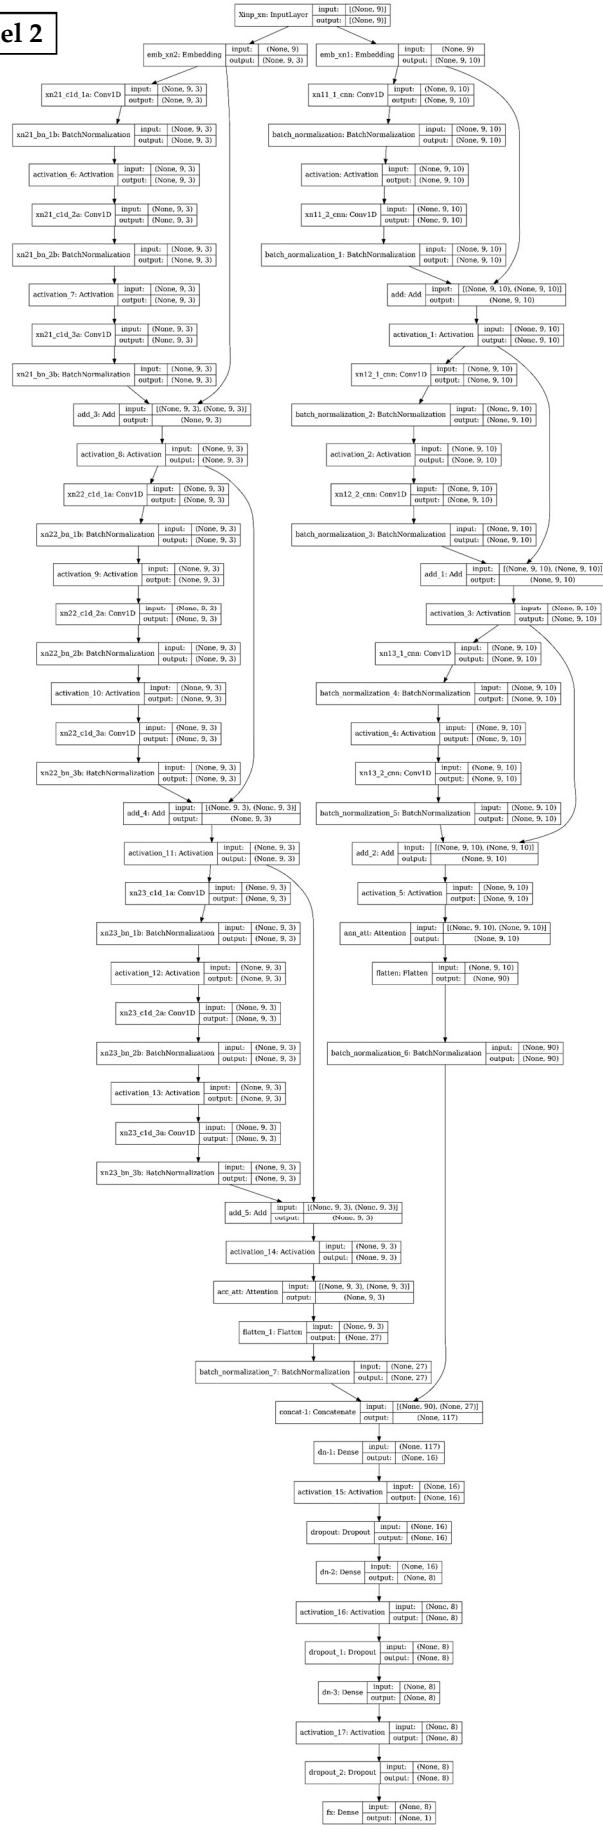

### Model 3

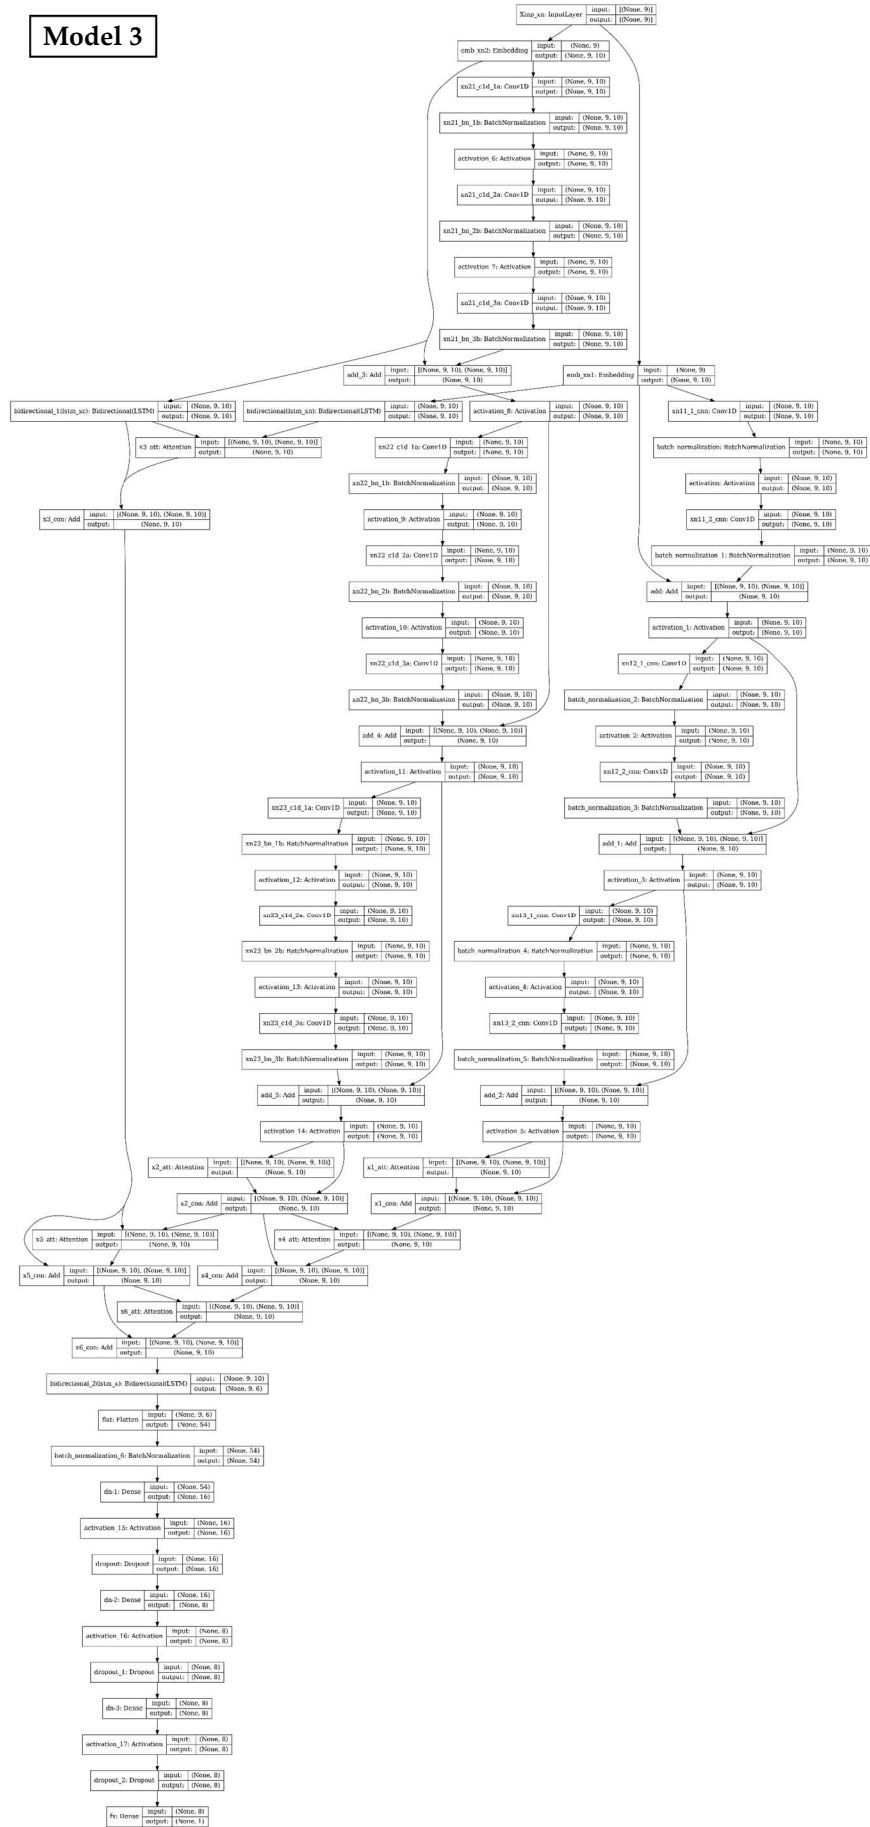

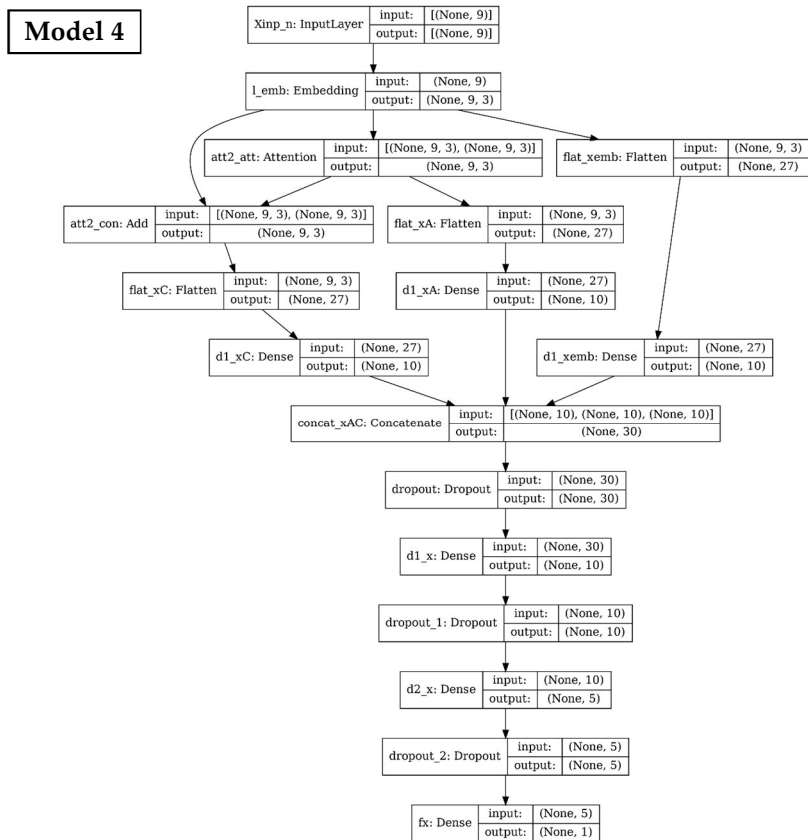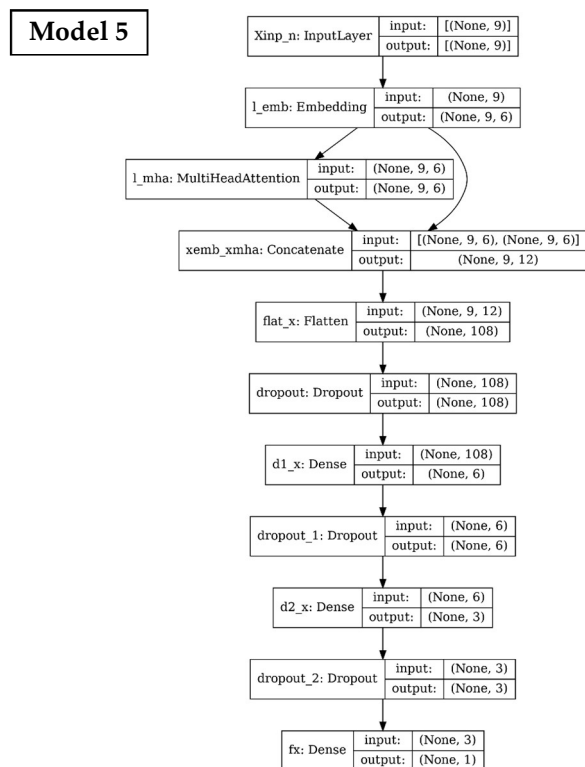

**Figure S1.** Model architecture of the 5 models (Model 1 to Model 5) in AiCPP. Each box represents one layer. There are embedding layers, CNN layers, LSTM layers, attention layers, etc.

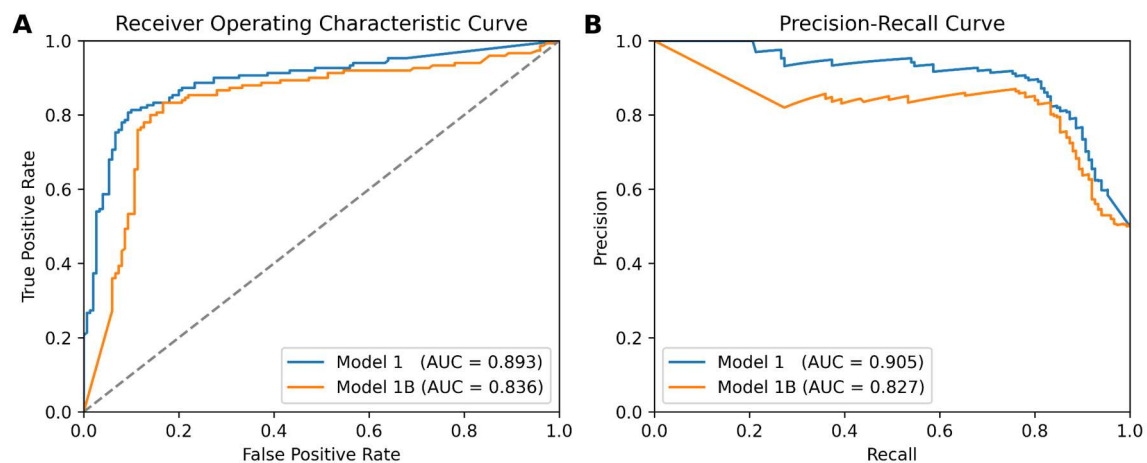

**Figure S2.** Comparison of the model performance by the ROC-metric with (Model 1) and without (Model 1B) the use of a large number of the 11,046,343 9-mers negative datasets derived from human reference proteins.

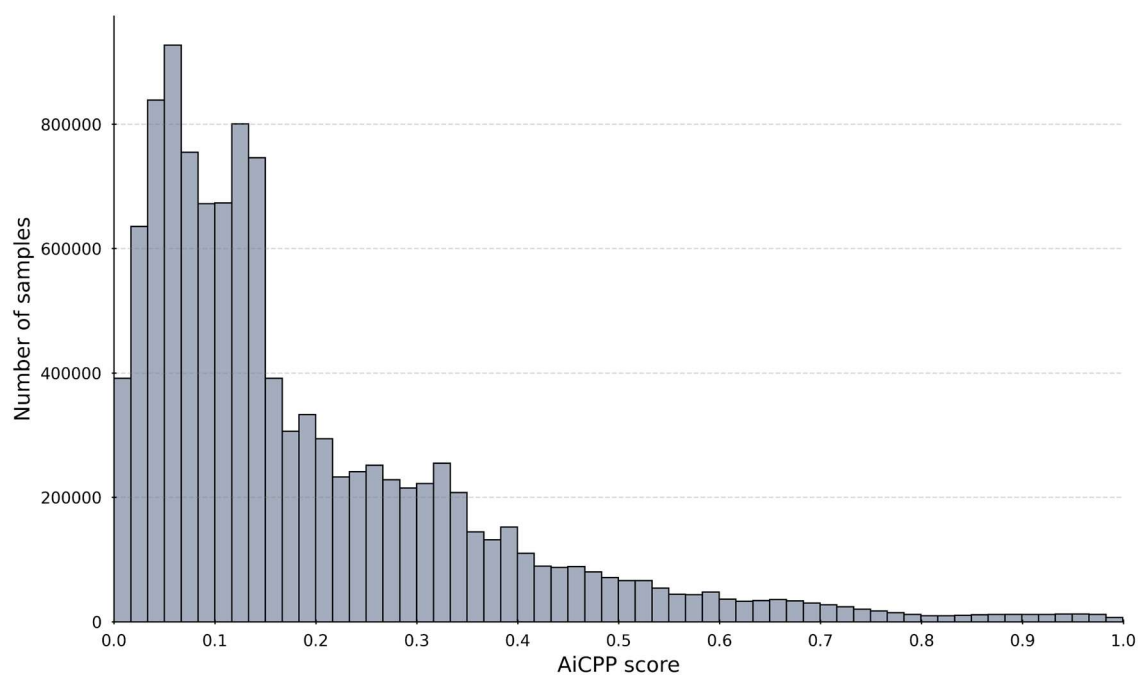

**Figure S3.** The AiCPP scores for the 11,046,343 9-mers generated from human reference proteins. There are about 770,435 or 6.97% 9-mers with AiCPP scores  $\geq 0.5$ .

**Table S1.** Comparison of the metrics of the model performance with (Model 1) and without (Model 1B) the use of about 11 million of a large number of negative datasets derived from human reference proteins.

| Models          | AUC          | MCC          | ACC          | SEN          | SPE          | PRE          |
|-----------------|--------------|--------------|--------------|--------------|--------------|--------------|
| <b>Model 1</b>  | <b>0.893</b> | <b>0.711</b> | <b>0.853</b> | 0.800        | <b>0.907</b> | <b>0.896</b> |
| <b>Model 1B</b> | 0.836        | 0.640        | 0.820        | <b>0.833</b> | 0.807        | 0.812        |
