# Supplementary material for: In Silico Screening and Optimization of Cell-Penetrating Peptides Using Deep Learning Methods
Source: Biomolecules. 2023 Mar 13;13(3):522. doi: 10.3390/biom13030522 (PMC10046020; doi:10.3390/biom13030522)
Supplement: Supplementary file 1 [file biomolecules-13-00522-s001.zip]

Archive with 4 entries (4 files):
- biomolecules-2162660_Supplementary information.pdf
- biomolecules-2162660_Supplementary Spreadsheets S1 Test Set.csv
- biomolecules-2162660_Supplementary Spreadsheets S2 Train Set.csv
- biomolecules-2162660_Supplementary Spreadsheets S3 9-mer Set.csv
