# Supplementary material for: In Silico Screening and Optimization of Cell-Penetrating Peptides Using Deep Learning Methods
Source: Biomolecules. 2023 Mar 13;13(3):522. doi: 10.3390/biom13030522 (PMC10046020; doi:10.3390/biom13030522)
Supplement: Supplementary file 1 [file biomolecules-13-00522-s001.zip › biomolecules-2162660_Supplementary Spreadsheets S1 Test Set.csv]

sequence	class
PKKGSKKAVTKAQKKDGA	CPP
MAPTKRKGSCPGAAPNKKP	CPP
RFTFHFRFEFTFHFE	CPP
DWLKAFYDKVAEKLKEAF	CPP
YGDCLPHLKLCKENKDCCSKKCKRRGTNIEKRCR	CPP
HSDGIFTDSYSRYRKQMAVKKYLAAVLGKRYKQRVKNK	CPP
RQIKIWFQNRRMKWKKC	CPP
FKCRRWQWRMKKLGAPSITCVRRAF	CPP
WELVVLGYGRKKRRQRRR	CPP
RHVYHVLLSQ	CPP
YRDRFAFQPH	CPP
RLRLRLRLRLRLRLRLKLLKLLKLLKLLKKKKKKKGYK	CPP
RRRRRRRRRETWWETWWTEW	CPP
KETWWETWWTEWSQPKKRKV	CPP
LIRLWSHLIHIWFQNRRLKWKKKC	CPP
KKLALHALHLLALLWLHLAHLALKK	CPP
RRLTLRQLLGLGSRRRRRSR	CPP
CKDEPQRRSARLSAKPAPPKPEPKPKKAPAKK	CPP
WELVVAYGRKKRRQRRR	CPP
RKKAAA	CPP
KALKKLLAKWAAAKALL	CPP
GRKKRRQRRRG	CPP
GLRKRLRKFRNKIKEKGLRKRLRKFRNKIKEK	CPP
NYQWRCKNQN	CPP
RRRRWWWW	CPP
RQIKIWFQNRRMKWKKGG	CPP
CCTGRKKRRQRRR	CPP
ACRGRGRGCGRGRGRCG	CPP
STGKANKITITNDKGRLSK	CPP
LKKLLKLLKKLLKLAG	CPP
WRRRYRRWRRRRRWRRRPRR	CPP
NYRWRCKN	CPP
PKKKRKVRRRRRRRPQMQQNVFQYPGAGMVPQGEANF	CPP
VVLYKYRCYKVI	CPP
HGWEIHGLLHRA	CPP
NTCTWLKY	CPP
FKCRRWQWRMKKLG	CPP
NYRWRCKNQ	CPP
LELELELELELELELELELE	CPP
AEQNPIYWARYADWLFTTPLLLLDLALLVDADEGT	CPP
DVVRVWFCNRRQKGKR	CPP
RRLRHLRHHYRRRWHRFR	CPP
ARRCSGSGSGCGSGSGSCGRR	CPP
NYQRRCKNQN	CPP
VGALAVVVWLWLWLWAGSGPKKKRKVC	CPP
HHHHHHHHH	CPP
TAMRAVDKLLLHLKKLFREGQFNRNFESIIICRDRT	CPP
KFFKFFKFFK	CPP
KNLRRIIRKGIHIIKKYF	CPP
CREKAKKLFKKILKKL	CPP
NAATATRGRSAASRPTQRPRAPARSASRPRRPVQ	CPP
VKKKKIKREIKIAAQRYGRELRRMADEFHV	CPP
CGGGRRRRRRRRRLLLL	CPP
ELVVLGKLYGRKKRRQRRR	CPP
VKRFKKFFRKLKKLV	CPP
TRSSRAGLQFPVGRVIIRLLRK	CPP
RPKRPTTLNLFPQVPRSQDT	CPP
AGYLLGHINLHHLAHLHHIL	CPP
KGRKKRRQRRRPPQ	CPP
RARRNRRARILFQYRARNRARN	CPP
GLFEAIEGFIENGWEGMIDGWYGGGGRRRRRRRRRK	CPP
CKYGRKKRRQRRR	CPP
KKRTLRKNDRKKRC	CPP
LILIGRRRRRRRRGC	CPP
ARRRRCSDRFRNCPADEALCGRRRR	CPP
GDCLPHLKLCKENKGCCSKKCKRRGTNIEKRCR	CPP
RLLRLLRLL	CPP
CRKKRRQRRR	CPP
YGRKKRRQRRRGC	CPP
FFLIPKGRRRRRRRRR	CPP
LLGDFFRKSKEKIGKEFKRIVQRIKDFLRNLVPRTES	CPP
SARRRRRREW	CPP
KDCERRFSRSDQLKRHQRRHTGVKPFQK	CPP
ACRDRFRRCPADRRLCG	CPP
RRRRRRRRC	CPP
HATKSQNINF	CPP
RRRRRRRRRR	CPP
LVVLGKLYGRKKRRQRRR	CPP
GRGDGPRRKKKKGPRRKKKKGPRR	CPP
LAQLLAQLLAQLGGGGRRRRRRRRR	CPP
AGYLLGKTNLKALAALAKKIL	CPP
CRGDKGDPC	CPP
GRCTKSIPPICFPA	CPP
KNNLKECGLY	CPP
TFFYGGSRGKRNNFKTEEY	CPP
YTFGLKTSFNVQ	CPP
IPLVVPLC	CPP
CDAGRKQKC	CPP
KWRRKLKKLRPKKKRKV	CPP
GLKKLAELAHKLLKLGC	CPP
YARVRRRGPRRR	CPP
ACSGRGSGCGSGRGSCG	CPP
GNGEQREMAVSRLRDCLDRQA	CPP
GRKKRRQ	CPP
AKRGARSTA	CPP
LKKLAELAHKLLKLG	CPP
RRRRRRWWW	CPP
ACRGRGRGCGSGSGSCG	CPP
HTPGNSNKWKHLQENKKGRPRR	CPP
YGRKKRRQRRTALDWSWLQTE	CPP
WEAVVAYGRKKRRQRRR	CPP
RRLLRRLRR	CPP
KLAKLAKKLAKLAK	CPP
LLIILRRPIRKQAHAHSK	CPP
FKCRRWQWRMKKLGKRSKNKGFKEQAKSLLKWILD	CPP
LRKLRKRLLR	CPP
RRRRRHHH	CPP
WRWRWRWRW	CPP
KMTRAQRRAAARRNRWTAR	CPP
RGGRLCYCRRRFCVCVGR	CPP
RLHRRLHRRLHRLHRRLHRLHRRLHRRLH	CPP
CSKSSDYQC	CPP
RKGWFKAMKSIAKFIAKEKLKEHL	CPP
LRHHLRHLLRHLRHLLRHLRHHLRHLLRH	CPP
ARRRRCSGSGSGCGSGSGSCGRRRR	CPP
FHFHFRFR	CPP
GRKKRRERRRPPERKC	CPP
GGVCPKILRRCRRDSDCPGACICRGNGYCGSGSD	CPP
NTCTWLKYHS	CPP
PPPPPPPPPPPLRR	CPP
RHHLRHLRRHLRHLLRHLRHHLRHLRRHLRHLL	CPP
GRCTKSIPPICWPD	CPP
RRRRRRRHHH	CPP
KKKKKKKKK	CPP
KRKRWHW	CPP
REDEDEIEW	CPP
RKKRRQRRRGKKKKKKKKKKKKKKKGRKKRRQRRR	CPP
ARRRCSDRFRNCPADEALCGRRR	CPP
WRWKKKKA	CPP
RRRRRRRRRRWWWWWW	CPP
CARSKNKDC	CPP
YGRKKRRQRRRYGRKKRRQRRR	CPP
RRRRRRRRGC	CPP
LALALALALALALAKLAKLAKLAKLAKIKKIKKKIK	CPP
NTGTWLKYHS	CPP
NYRWRCK	CPP
DAATARGRGRSAASRPTERPRAPARSASRPRRPVD	CPP
KRKKKGKGLGKKRDPCLRKYK	CPP
ACRGRGRRCGSGRRSCG	CPP
NAKTRRHERRRKLAIER	CPP
YGRKKRRQRRRPPLRKKKKKH	CPP
KLAKLAKKLAKLAKGGRRRRRRR	CPP
ACSGSGSGCGSGSGSCGRRRRRRRR	CPP
YGRGGRRGRRR	CPP
TRQARRNRRRWRERQR	CPP
APKRKSGVSK	CPP
RRRRRRRRK	CPP
RKKNPNCRR	CPP
TWLKYH	CPP
AAVALLPAVLLALLAKNNLKECGLY	CPP
FLGALFKVASKVLPSVFCAITKKC	Non-CPP
AITFYPFAPNQITCIHE	Non-CPP
IKRYLIKR	Non-CPP
CLGSGEQCVRDTSCCSMSCTNNICF	Non-CPP
FITKALGISYGRKKRRQS	Non-CPP
PLGPVVHKCCPGFGGLQWLPLLWNWYQNMWGN	Non-CPP
GWTNLSAGCLLGPPPGFSPFR	Non-CPP
DFDMLRCMLGRVYRPCWQV	Non-CPP
LLATTALLKTTALLKTTA	Non-CPP
TERQGKIWFQNRRMK	Non-CPP
KIWFMNRRMK	Non-CPP
VQQQQPLGQQQP	Non-CPP
IAARIKLRSRQYIKLRHL	Non-CPP
EMCILIDENDNKIGADTKKNCHLNENIDKGLLHRA	Non-CPP
AHALCLTERQIKSNRRMKWKKEN	Non-CPP
PVVHLTLRQAGDDFSR	Non-CPP
PVVHLTLRQAGDDFGR	Non-CPP
FKMHEN	Non-CPP
GMNCSREYAHCTSAYV	Non-CPP
MIRIAALNASSTIEDDHEGSFKSHKIQTKEAQEAE	Non-CPP
ELFSPIAIAVLGSCVL	Non-CPP
EGGGPQWAVGHFM	Non-CPP
FLSFLLGPLIDLISKG	Non-CPP
FLPFLAKILTGVL	Non-CPP
LLKTTELLKTTELLKTTS	Non-CPP
SNGHACRPW	Non-CPP
QGARNYKCCFAWC	Non-CPP
GWTLNSAGYLNGKFLPLILRKIVTAL	Non-CPP
GWTNLSAGYLLGPPPGFSPFR	Non-CPP
MIEMAM	Non-CPP
CVCVKTTSLVRPRHI	Non-CPP
TPTSPSSPGLSPVPPPDKVDGFSRRSLRRARPRR	Non-CPP
GLFLDTLKGLAGKLLQGLKCIKAGCKP	Non-CPP
NAGGWFSSWFFSNTANEDQDDMLPSTSAAAGETNYARN	Non-CPP
GAPRLVLLFSGKRKSGKDFVTEA	Non-CPP
CVKLNDGHFMPVLGFGTYAPPEVPRSKALEVTKLA	Non-CPP
IDLNITMLEDHEFVP	Non-CPP
HGVSGHGQHGVHG	Non-CPP
IAARIFLRSRQHIKLRHL	Non-CPP
GSSGMIPFPRV	Non-CPP
ENGPDQWSKLYP	Non-CPP
YTMQMLLEIHRKNW	Non-CPP
EILLPNNYNAYESYKYPGMFIALSK	Non-CPP
INWLKLGKAIIDAL	Non-CPP
ARFSNPGVWSKVAADIFNMALDTALA	Non-CPP
AGCKNFFWKMFTSC	Non-CPP
FITKALGISYGRKWRRQC	Non-CPP
ADCKNFFWKTFTSC	Non-CPP
VIVYIVVKDASSK	Non-CPP
KLAAKLALKALKAA	Non-CPP
DKLGVWFIWANNASVFHAYHLKC	Non-CPP
KKLSECLKRIGDELDN	Non-CPP
TAAGDARANAVAKAGLHDLNIETDTERNH	Non-CPP
FDPYALSEHDEERPQNVQSKSRTAELQAEIDDTVGI	Non-CPP
NSDMAHERKFMWQYNR	Non-CPP
KKKQYTWIHHGVVEVD	Non-CPP
QAHVHVWHKYSVKTVYH	Non-CPP
PVVHLTLRQEGDDFSR	Non-CPP
GRKKHRQPPQC	Non-CPP
KLALKALKAALKPA	Non-CPP
FQAYPCITAYKVMYID	Non-CPP
VATIKSVSFYTRK	Non-CPP
DFDMLRCMLGRVYYPCWQV	Non-CPP
GCCSHPACNVNNPHICG	Non-CPP
SHMMGEFWGDEDMCYRHQRSYET	Non-CPP
HDEFERHAEGEFTSDVSSYLEGQAAKEFIAWLVKGR	Non-CPP
QIMISA	Non-CPP
TRTSRGWHTTDLKYN	Non-CPP
YSSQHLCGSNLVEALYMTCGRSGFYRPHD	Non-CPP
TERQIKIWFQNRRMK	Non-CPP
FLGVVFKLASKVFPAVFGKV	Non-CPP
MPVMFYFSARNEVALVLVYFNFMIMMMH	Non-CPP
FLPLLAGVVANFLPQIICKIARKC	Non-CPP
GFFTLIKAANKLINKTVNKEAGKGGLEIMA	Non-CPP
KKKKKKKKLLLLLLLL	Non-CPP
LLGKGNLKALAALAKKIL	Non-CPP
QIFWDSRHPSQH	Non-CPP
HAQKQLSKTSWDFIEGEADDGITYSENIAAFKRIRLR	Non-CPP
APVTGAHMAYVDYWVPCQFTECSGEYVTEEYRKA	Non-CPP
GIVEQCCDTPCSLYDPENYCN	Non-CPP
AVNANFGWQDKRFSTFG	Non-CPP
RPEGQNYTEGIAVVF	Non-CPP
QWGYGGMPYGGYGGMGGYGMGGYGMGY	Non-CPP
QEHDYGNLDLCN	Non-CPP
KKLSECLKRIGVELDS	Non-CPP
FTFGGGYVYFEEYAY	Non-CPP
SYNTF	Non-CPP
LMLRTVGYKFHCSLPVNAVHCSLK	Non-CPP
YTPNDITLNNSVALDPIDISIELNKAKSDLEESKE	Non-CPP
NWVTMKDSADSIDHECPRYFDTCERSCKISE	Non-CPP
TERQIKIWFQNRCMK	Non-CPP
GGTSSSDAQQSLQSFWPRVM	Non-CPP
FLAGLIGGLAKML	Non-CPP
MEPLWWANYDNTQ	Non-CPP
LNSLGYLLGKALAALAKKIL	Non-CPP
LNSAGYLLGKPKALAALAK	Non-CPP
GWTLNSAGYLLEPHAI	Non-CPP
PLDGMCDKGNYTQ	Non-CPP
QKVAFCDCCYDDIYTVEFKGCIFRPK	Non-CPP
CYFQNCPRG	Non-CPP
SDPSVPLRPEEDELIDQ	Non-CPP
IVMVGDGGVGKSAMTIQFIQSTFV	Non-CPP
LSNTLAELYVREHLR	Non-CPP
SRISNRLSSSATRT	Non-CPP
MVMEMRNF	Non-CPP
ILRRRIRKQAHFHSK	Non-CPP
KLDFLGEGQFATVYKARDKNT	Non-CPP
TAQVFFNVYKKAKPN	Non-CPP
TTPFTIRGPLGNQGRGNPVR	Non-CPP
FVPFFTHSELQKIREKERNKGQ	Non-CPP
MDMVAIDDQDYIMCHF	Non-CPP
QNLGNDWAVGHLM	Non-CPP
IHSHWFVMVLKGKAARQRDDLWTHPCFPS	Non-CPP
GHHSLKITDDPFDVPFPINDDHDS	Non-CPP
IAARIKLRSRQHIKLRHL	Non-CPP
AHALCLTEFQIKSNRRMKWKKEN	Non-CPP
LIKRKRLI	Non-CPP
GWTNLSAQYLLGPPPGFSPFR	Non-CPP
RFVHNC	Non-CPP
MLPRLICINDYEQHAKSVLPKSIYDYYRSGANDEE	Non-CPP
EILLPNSYNAYESYKYPGMFIALSK	Non-CPP
KLALKLACKALKAA	Non-CPP
PDEIGGKFPTAYVQDYLINPE	Non-CPP
VIVTERVLLLVAP	Non-CPP
LLKTTALLKTTALHKTTA	Non-CPP
FLPLFLPKIICVITKKC	Non-CPP
CYFQNCPVG	Non-CPP
VDFEEAYLAVS	Non-CPP
QNLGNQWAVGHLM	Non-CPP
QSGAKPGHCEWQSTHLKNCEKVNDIRQPPHHQRS	Non-CPP
GWTNLSAGYLLGPPPGFSPFS	Non-CPP
SWFASTGGRDSKIDVWSLVP	Non-CPP
VTQADVGSALANLKIPGVGS	Non-CPP
FLPVLAGIAAKVVPALFCKITKKC	Non-CPP
FGCKNFFWKTFTSC	Non-CPP
MNASQVAGEEAPQSGHSVKVVLVGDGGCGKTSLMMVF	Non-CPP
KKLSECLKRIGDELDS	Non-CPP
FVPIFTHSELQKIREKERNKGQ	Non-CPP
HDEFERHAEGTFTSDVFSYLEGQAAKEFIAWLVKGR	Non-CPP
QQPFVQQQQPFVQQ	Non-CPP
CPLDQFECGGDEPG	Non-CPP
HADGLFTSGYSKLLGQLSARRYLESLI	Non-CPP
LLKHTALLKTTALLKTTA	Non-CPP
YMVGLCDYHILYSGWGQMDWHPEPHFYAWMYR	Non-CPP
YGFMELFDDVTAIFSIDHCQEEYYEQMANNVM	Non-CPP
KLFNGNEVCLDPKEKWVQKVVQIFLK	Non-CPP
CAETCIYIPCFTEAVGCKCKDKVCYKN	Non-CPP
KKLSLCLKRIGDELDS	Non-CPP
ICITRRSICMVTCNKEWPQNRNAHTFLI	Non-CPP
GWTLHSAGYLLGPHAI	Non-CPP
