# Supplementary material for: In Silico Screening and Optimization of Cell-Penetrating Peptides Using Deep Learning Methods
Source: Biomolecules. 2023 Mar 13;13(3):522. doi: 10.3390/biom13030522 (PMC10046020; doi:10.3390/biom13030522)
Supplement: Supplementary file 1 [file biomolecules-13-00522-s001.zip › biomolecules-2162660_Supplementary Spreadsheets S3 9-mer Set.csv]

sequence	class
KTTELLKTT	Non-CPP
LKTTELLKT	Non-CPP
TTELLKTTE	Non-CPP
LKLKLKLKL	Non-CPP
KLKLKLKLK	Non-CPP
LLKTTELLK	Non-CPP
KIREKERNK	Non-CPP
ELQKIREKE	Non-CPP
QKIREKERN	Non-CPP
LQKIREKER	Non-CPP
GYLLGPHAI	Non-CPP
SAGYLLGPH	Non-CPP
AGYLLGPHA	Non-CPP
ELLKTTELL	Non-CPP
GHHPHGHHP	Non-CPP
LGQGSFRPS	Non-CPP
YLEGQAAKE	Non-CPP
CSCKSKVCY	Non-CPP
THSELQKIR	Non-CPP
VESLSSSEE	Non-CPP
AAKEFIAWL	Non-CPP
FTHSELQKI	Non-CPP
SELQKIREK	Non-CPP
FVPIFTHSE	Non-CPP
AARIKLRSR	Non-CPP
IFTHSELQK	Non-CPP
HSELQKIRE	Non-CPP
KKQYTSIHH	Non-CPP
KQYTSIHHG	Non-CPP
YDRDIMSFG	Non-CPP
SWPVCTRNG	Non-CPP
KYPGMFIAL	Non-CPP
AKEFIAWLV	Non-CPP
AGKAALGAV	Non-CPP
VPIFTHSEL	Non-CPP
NSAGYLLGP	Non-CPP
YKYPGMFIA	Non-CPP
ARIKLRSRQ	Non-CPP
ATAATPATA	Non-CPP
RDVRFESIR	Non-CPP
PGMFIALSK	Non-CPP
YPGMFIALS	Non-CPP
LPRASAAAM	Non-CPP
SYKYPGMFI	Non-CPP
KIFCAISKK	Non-CPP
TAATPATAA	Non-CPP
GCSCKSKVC	Non-CPP
ESLSSSEES	Non-CPP
LSSSEESIT	Non-CPP
PHGHHPHGH	Non-CPP
EGQAAKEFI	Non-CPP
SLSSSEESI	Non-CPP
DVRFESIRL	Non-CPP
HPHGHHPHG	Non-CPP
TELLKTTEL	Non-CPP
HGHHPHGHH	Non-CPP
AAALPRASA	Non-CPP
SYLEGQAAK	Non-CPP
SSYLEGQAA	Non-CPP
EAAALPRAS	Non-CPP
LEGQAAKEF	Non-CPP
RIKLRSRQH	Non-CPP
KLRSRQHIK	Non-CPP
GYLLGPPPG	Non-CPP
IFCAISKKC	Non-CPP
KKKQYTSIH	Non-CPP
RPPGFSPFR	Non-CPP
YGRKKRRQC	Non-CPP
GQAAKEFIA	Non-CPP
YRDVRFESI	Non-CPP
RVYRPCWQV	Non-CPP
ALPRASAAA	Non-CPP
PIFTHSELQ	Non-CPP
IAARIKLRS	Non-CPP
DFDMLRCML	Non-CPP
SEAAALPRA	Non-CPP
CSKLMYDCC	Non-CPP
IKLRSRQHI	Non-CPP
AALPRASAA	Non-CPP
HHPHGHHPH	Non-CPP
QAAKEFIAW	Non-CPP
RYNMTINQT	Non-CPP
WNKIKEAAS	Non-CPP
WHNWFVGVP	Non-CPP
GCCSTPPCA	Non-CPP
MTLLPEHTV	Non-CPP
QPGKTSQRA	Non-CPP
SSNAGNGST	Non-CPP
GYLKKLGTG	Non-CPP
EVKPDDEEV	Non-CPP
HQMPPVDPS	Non-CPP
FAKKCCAIG	Non-CPP
QGRLTLSRK	Non-CPP
ATKLALHRA	Non-CPP
LVDEQVSRK	Non-CPP
VTGKDCPHM	Non-CPP
TTRICCGYC	Non-CPP
MMDDGTEPN	Non-CPP
TDLLKTAGK	Non-CPP
SVVKHVHGL	Non-CPP
PATAATPAT	Non-CPP
SGPPVLEPQ	Non-CPP
DHLRREFAK	Non-CPP
TIGDAIEAI	Non-CPP
QGTFGECDS	Non-CPP
AANFLPKIF	Non-CPP
EMLPQHAAK	Non-CPP
DNGMTSLGS	Non-CPP
KYDNKTLFA	Non-CPP
KMKGAGKAV	Non-CPP
YLANGEL--	Non-CPP
KVTKKTLTL	Non-CPP
IKHDASIDE	Non-CPP
RGKLKLYTG	Non-CPP
FFNDLVEFM	Non-CPP
EIKFTIKQV	Non-CPP
YECNICKVR	Non-CPP
GITKDFLTF	Non-CPP
QRIVLGLDA	Non-CPP
LSKESGKKE	Non-CPP
DPRCTVLGA	Non-CPP
HSSALLCCL	Non-CPP
GSVDFKKNW	Non-CPP
ERGLLHSSQ	Non-CPP
PSGILTPGV	Non-CPP
NALVNSIKG	Non-CPP
YIYLDSAAT	Non-CPP
SLYWRVVAA	Non-CPP
WEGIESGSV	Non-CPP
SVYIYLFML	Non-CPP
LAGKLLDSL	Non-CPP
LMYMTTEQC	Non-CPP
SMYYGHDMF	Non-CPP
YWEIINFLM	Non-CPP
SYQCWCPEE	Non-CPP
PFSNLAPLM	Non-CPP
CHHIHVHNY	Non-CPP
IKDSGFKIT	Non-CPP
SYNPDICVA	Non-CPP
QITPNEAFQ	Non-CPP
CQVGCIRKD	Non-CPP
GFEDSYRNY	Non-CPP
IEWAWRTGD	Non-CPP
RYRNIEPQA	Non-CPP
WLGAIGMLV	Non-CPP
AVLFLTACQ	Non-CPP
IWFQNRRIK	Non-CPP
FKKNWIQYK	Non-CPP
YIDIIKGNV	Non-CPP
YLNHNRIES	Non-CPP
WQEPQVVYK	Non-CPP
DCGGPKTQP	Non-CPP
YIEKGLQKA	Non-CPP
DNFYKWTAK	Non-CPP
EESPKRAPS	Non-CPP
RRNCNKYRC	Non-CPP
RHTESSSRG	Non-CPP
IHEDPSLNY	Non-CPP
VSEDNFYKW	Non-CPP
SKQFLGELA	Non-CPP
CKVRFTRQD	Non-CPP
VGIMDAKKA	Non-CPP
CDWPVCKRD	Non-CPP
ATGKAASFV	Non-CPP
RPQASPGLG	Non-CPP
SADEATARK	Non-CPP
YIDKFQVRE	Non-CPP
EIRIPIYVM	Non-CPP
FLAKKVAKK	Non-CPP
GCGVPAIHP	Non-CPP
SKNEAQQKS	Non-CPP
AINGVVRFV	Non-CPP
ASMMPIVLL	Non-CPP
KPIVIMEAL	Non-CPP
AGDKEKKPV	Non-CPP
KLSPSLGPV	Non-CPP
DSPDSMYYG	Non-CPP
QWFSKFLGR	Non-CPP
TVESLSSSE	Non-CPP
RLGTQWAVG	Non-CPP
LPPGPPIPR	Non-CPP
SSKNDKGSQ	Non-CPP
VIQANTISS	Non-CPP
ALNCVLDLD	Non-CPP
KHGDFCDGD	Non-CPP
KRVIQANTI	Non-CPP
NKKNPRFKQ	Non-CPP
GKQLHAAVH	Non-CPP
CLCCPRHRP	Non-CPP
AICSWWRRV	Non-CPP
EGQRQENKN	Non-CPP
LPFIITALV	Non-CPP
PLGQGSFRP	Non-CPP
APMFRRRRY	Non-CPP
ASVVSAVQM	Non-CPP
VRPGEIVST	Non-CPP
SVVGCSCKS	Non-CPP
GKCVNGACD	Non-CPP
MAMGRLGLR	Non-CPP
NYTRLRKQM	Non-CPP
VGKTVGGLA	Non-CPP
GIGKFLKKA	Non-CPP
ISDLLMRES	Non-CPP
RHKINSFVG	Non-CPP
ILRKIVTAL	Non-CPP
MSNRGASLK	Non-CPP
KIVEEKDAN	Non-CPP
PLLGGGGGG	Non-CPP
FGKMKEYFK	Non-CPP
VRRQEAVDA	Non-CPP
FCGIGERCR	Non-CPP
GQPLEAWSA	Non-CPP
THTVMINHA	Non-CPP
LPLPWLLVL	Non-CPP
VTVAKEGID	Non-CPP
PFGLLFTRL	Non-CPP
RLHVIVRET	Non-CPP
LRQSSKQVK	Non-CPP
ILSDSYNPD	Non-CPP
GGMEMWLLY	Non-CPP
NCVTLVWRM	Non-CPP
NYKKTPTQV	Non-CPP
RRRQGWLKE	Non-CPP
EGEEDRDVG	Non-CPP
KPSCPWGSS	Non-CPP
TDSNFDWWE	Non-CPP
TWTLLALLI	Non-CPP
FVGSEKALD	Non-CPP
PRFKQRQGM	Non-CPP
LREQSRKPP	Non-CPP
PVLSGLSRI	Non-CPP
LPTMGGQTA	Non-CPP
AELPRLLAE	Non-CPP
VVRLGRTAA	Non-CPP
RTGTGGGAP	Non-CPP
PCEKMKVTK	Non-CPP
VTILNNHLT	Non-CPP
IPTSGAEIG	Non-CPP
LGGTALPQI	Non-CPP
FPNVASVPG	Non-CPP
EMFVPFPMR	Non-CPP
GRWMALDLY	Non-CPP
DMGWRYDNP	Non-CPP
EEKPRQLVA	Non-CPP
VCSHVVRNG	Non-CPP
TGTCYTPGC	Non-CPP
INEVEVIEE	Non-CPP
VSIFCGIGE	Non-CPP
HTYEGGTHE	Non-CPP
NNNNKSSMV	Non-CPP
VYPGLLAAS	Non-CPP
KQVGLSHGA	Non-CPP
KSALEPGFL	Non-CPP
KYDDGRDPR	Non-CPP
KMIFHHSDA	Non-CPP
QSPGDPTNS	Non-CPP
LYQLENYCN	Non-CPP
RIGAAEKAS	Non-CPP
GCPLLQGTC	Non-CPP
PETLISDLL	Non-CPP
NGVQEETSE	Non-CPP
GSEKALDAA	Non-CPP
VEIAQTIRR	Non-CPP
YSMKKMSMK	Non-CPP
RCQQANVGT	Non-CPP
GIAHALPES	Non-CPP
DEEECSSAC	Non-CPP
DNLQETIQS	Non-CPP
LEYRRTNFE	Non-CPP
GSIPFGLLF	Non-CPP
HGRWMALDL	Non-CPP
LRRNGRQCG	Non-CPP
IHHGVVEVD	Non-CPP
VARSLAKYH	Non-CPP
IKIAIINCD	Non-CPP
FNQLVRKYL	Non-CPP
RHRNRVKKL	Non-CPP
DKDKSSKND	Non-CPP
RPEYMHSAT	Non-CPP
SIGSSLVAN	Non-CPP
VDSLDKDIK	Non-CPP
RGDRMQFAS	Non-CPP
MKLNGGKSL	Non-CPP
VDELRQVIE	Non-CPP
YIADLDTFF	Non-CPP
RDSLQRGGQ	Non-CPP
LYLAQGTFG	Non-CPP
PRPQAPRPG	Non-CPP
EKQSVPAKE	Non-CPP
CITIPECCR	Non-CPP
FFGKMIFHH	Non-CPP
LKLSLADEN	Non-CPP
DRPTRAMDS	Non-CPP
GSSSWCNEE	Non-CPP
NWKGSWYSM	Non-CPP
EVLLKAAMT	Non-CPP
LSTGYLLGP	Non-CPP
DRFGTILEN	Non-CPP
DAHAEECFF	Non-CPP
HKINSFVGL	Non-CPP
HFPGHNLRW	Non-CPP
EAVGLSGGV	Non-CPP
MLPLELPEV	Non-CPP
RAQLDILEA	Non-CPP
TVQETENFL	Non-CPP
ESWTQKLYQ	Non-CPP
VPVIITSGY	Non-CPP
APLVSRATV	Non-CPP
LSAGYLLGP	Non-CPP
QSLAPCLPY	Non-CPP
RRAQDFVQW	Non-CPP
WDSATGKAA	Non-CPP
YKFCKIRVR	Non-CPP
LSSEFWYFV	Non-CPP
FKVVTRSQE	Non-CPP
ATAHAESAV	Non-CPP
SSKHARRPS	Non-CPP
RNPRKNLLK	Non-CPP
NLKEGITVD	Non-CPP
AICNMACRL	Non-CPP
VETPTLTRS	Non-CPP
AGTYAPLPD	Non-CPP
HRFSLVTSG	Non-CPP
FCPLLMSFL	Non-CPP
LFCARIFGP	Non-CPP
KALKARLKL	Non-CPP
GSFRPSQQN	Non-CPP
RDAQAFAAG	Non-CPP
RKQRRERTT	Non-CPP
EYLSNVVTD	Non-CPP
LSIYEGIPH	Non-CPP
KLKDILGKI	Non-CPP
GAIAAALPH	Non-CPP
NWTNSFGSS	Non-CPP
TVLELERAP	Non-CPP
ILNAKAQNM	Non-CPP
IVSTAGEVL	Non-CPP
QAVALTHEA	Non-CPP
VRDSCGCGD	Non-CPP
RITYHPFCA	Non-CPP
PFFPPGICK	Non-CPP
FLKKAKKGI	Non-CPP
AEGTFTSDV	Non-CPP
SSRSPSASD	Non-CPP
YVLSRYPSY	Non-CPP
SLAGPVVSM	Non-CPP
SYERKKRRQ	Non-CPP
KNQSLHKWL	Non-CPP
AANAVRLSL	Non-CPP
FLKVKKDPQ	Non-CPP
MAMLEKRRA	Non-CPP
FDEPKKWAD	Non-CPP
ETSEGFPLE	Non-CPP
IIVLMPLAG	Non-CPP
DKEAWHGKP	Non-CPP
TVTSKPLNC	Non-CPP
APQVPARRL	Non-CPP
RGVCRCVCT	Non-CPP
GSTTRICCG	Non-CPP
LFRHHYNIP	Non-CPP
VASVPGQVL	Non-CPP
NASRDGFHI	Non-CPP
MAVSTCVPV	Non-CPP
PETSVLVLR	Non-CPP
FIAWLVNGR	Non-CPP
RNFVDKEDD	Non-CPP
RWMALDLYG	Non-CPP
KGRGLQHPP	Non-CPP
DAEEVEQKQ	Non-CPP
PVPSLNVLN	Non-CPP
FSLPRSLLD	Non-CPP
DPRTEAPRR	Non-CPP
VTGPLIIAV	Non-CPP
RERDAARRA	Non-CPP
CDSHCRGMD	Non-CPP
TGEGGSKEV	Non-CPP
PISAQMKYN	Non-CPP
LHLIPSGIL	Non-CPP
AMAFVRGLA	Non-CPP
FCSIYFHTL	Non-CPP
LIDRMGMTY	Non-CPP
RDAARRATV	Non-CPP
GLDMSRARR	Non-CPP
LLQELCCQH	Non-CPP
RPEAVEAEA	Non-CPP
LFDIIKNIV	Non-CPP
PSFDKLELL	Non-CPP
CFGRRLDRI	Non-CPP
LISGLLGVG	Non-CPP
WFFLARTDK	Non-CPP
IVHLLFLHE	Non-CPP
EEEESRPRK	Non-CPP
HTVMINHAG	Non-CPP
VLLTGTPLQ	Non-CPP
KNLYLNHNR	Non-CPP
FITKALGHS	Non-CPP
LGPLLGGGG	Non-CPP
IYKTCPEGC	Non-CPP
NLGGLFFLC	Non-CPP
DELAAASAA	Non-CPP
CCGYKLCHP	Non-CPP
RPSGAEKPY	Non-CPP
LKALLAVAK	Non-CPP
DLLKGVAKE	Non-CPP
LPESMLPLE	Non-CPP
RQCHDRVLS	Non-CPP
QENYLPSPC	Non-CPP
HIWDEWADE	Non-CPP
VPETDTQVT	Non-CPP
LNYLIDHIS	Non-CPP
GEKPYECNI	Non-CPP
KLKALAPAK	Non-CPP
HSSNNFGAI	Non-CPP
QEEPPLLPG	Non-CPP
KWVHAKCHH	Non-CPP
EPDCQFSKL	Non-CPP
LPEVLHGKK	Non-CPP
HQVKKIVEE	Non-CPP
ADLEKLTGK	Non-CPP
LGAIGMLVG	Non-CPP
CMCWQQGHR	Non-CPP
MPPVDPSQD	Non-CPP
ETWTLLALL	Non-CPP
AAGRYIEFC	Non-CPP
VQTAFVDND	Non-CPP
FLAEGGGVR	Non-CPP
GNKVILGHH	Non-CPP
VLAYLLDKN	Non-CPP
HGHLYPFCN	Non-CPP
GPVVVMVLE	Non-CPP
ERFDCEYRP	Non-CPP
MVGFMALLL	Non-CPP
PINAILAVE	Non-CPP
GLPSRDMST	Non-CPP
KRPKVYAFG	Non-CPP
QEITHIDFN	Non-CPP
LIELSGALE	Non-CPP
NKQNEQMHA	Non-CPP
RLLPLLLPL	Non-CPP
MVEAGFGCP	Non-CPP
WGGCRDWFC	Non-CPP
YLLGPPPGF	Non-CPP
AKEAGLKLL	Non-CPP
LGVQALSIA	Non-CPP
VTNVIGNGV	Non-CPP
VAARVVPKV	Non-CPP
MACVTPESF	Non-CPP
TIQECVSEY	Non-CPP
QYNNQPAAD	Non-CPP
TGIIQLPEG	Non-CPP
ETHNFSSTN	Non-CPP
KCSYTVWPG	Non-CPP
PYFSAETWT	Non-CPP
TTDKDKSSK	Non-CPP
EFGMPYVSI	Non-CPP
GLFFLCCTS	Non-CPP
LRVPYRRGT	Non-CPP
LPLVCLTVS	Non-CPP
TKNRREEVM	Non-CPP
NPYSFPKDR	Non-CPP
TQYNNQPAA	Non-CPP
EAGGPAWYH	Non-CPP
LWDFCNSDS	Non-CPP
EKAMQASIE	Non-CPP
DSGFKITAM	Non-CPP
ISSVVGCSC	Non-CPP
IEITSIDEC	Non-CPP
NNEINLNIK	Non-CPP
ATFPQASAS	Non-CPP
QEVYVRETS	Non-CPP
YAKNKAVGV	Non-CPP
KKVRLAWRV	Non-CPP
INAIKNTFG	Non-CPP
YFLPQFNTR	Non-CPP
AHGVAISDA	Non-CPP
WAKKVRLAW	Non-CPP
GSEVSALLG	Non-CPP
TIQSIYASF	Non-CPP
AIQNMAGDA	Non-CPP
PMCYSPTEW	Non-CPP
EYDAIHGTL	Non-CPP
VPFSNLAPL	Non-CPP
TYLEEAGAY	Non-CPP
TEKASRIGA	Non-CPP
HDHPEKKDP	Non-CPP
GTGLSATLP	Non-CPP
PGSKISVIR	Non-CPP
DELRQVIEQ	Non-CPP
VTRSQEDPN	Non-CPP
NRIIFDSVG	Non-CPP
KETNQNLDI	Non-CPP
CTHTIICRC	Non-CPP
VDIGEEKPR	Non-CPP
QQECKLLYS	Non-CPP
LPVLARLAV	Non-CPP
HLAVADLEA	Non-CPP
CQCCRDNGF	Non-CPP
KLATKIIPS	Non-CPP
PSGDDFGDY	Non-CPP
SILGKFAKG	Non-CPP
GLRSKIWLW	Non-CPP
NMSSFFLML	Non-CPP
AADKKDSNL	Non-CPP
LIGSRFCQE	Non-CPP
EAIKMWWFF	Non-CPP
LVLRKPGIN	Non-CPP
MSSFFLMLV	Non-CPP
SCVAEPECR	Non-CPP
GREEYNPDK	Non-CPP
IGGLISAIK	Non-CPP
CCGSFACRF	Non-CPP
KGKGAVDYW	Non-CPP
RPETSSGRR	Non-CPP
KILTGRAKE	Non-CPP
RADSVAQEI	Non-CPP
QDPLAIGPP	Non-CPP
CPWGSSSWC	Non-CPP
NTTIEKEIC	Non-CPP
SSHQHSRRR	Non-CPP
AEWDSTEKI	Non-CPP
SRGYFFFRP	Non-CPP
MKEYFKKFG	Non-CPP
GRGLQHPPP	Non-CPP
GTSNEEAGL	Non-CPP
QIAICSWWR	Non-CPP
KNLAGKLLD	Non-CPP
GKPLPKNMA	Non-CPP
TQTCEAEKC	Non-CPP
MYYGHDMFP	Non-CPP
PAILYNSGG	Non-CPP
EMGVTVAKE	Non-CPP
FGIRLHVIV	Non-CPP
IRLKAPAAL	Non-CPP
PLSKADLIR	Non-CPP
GCIDACPKN	Non-CPP
CHNTQLPFI	Non-CPP
IKKDIQDAL	Non-CPP
TSSDPVIQE	Non-CPP
VMINHAGRG	Non-CPP
RTGYGKDMV	Non-CPP
DIVKKVVGT	Non-CPP
FGTILENVI	Non-CPP
PSNSRNFIR	Non-CPP
KLFSFTKKY	Non-CPP
GVAISDADM	Non-CPP
PVGGEFLAE	Non-CPP
AGSEVSALL	Non-CPP
YDDGRDPRG	Non-CPP
FTVQGNPLE	Non-CPP
TVKRIDDGH	Non-CPP
GGDSTAAAK	Non-CPP
KNDFAMSSC	Non-CPP
MATVCGSSL	Non-CPP
WEGKLRGQT	Non-CPP
VVELSQEHL	Non-CPP
DFHAVIGQE	Non-CPP
FWDDFRYDI	Non-CPP
AKGLLEVAS	Non-CPP
NLGITKDFL	Non-CPP
RDSGCFGRR	Non-CPP
AKLFVPPER	Non-CPP
YGKPMEPEK	Non-CPP
QMPLYRRLP	Non-CPP
KEECECTAR	Non-CPP
ANEFLNLEG	Non-CPP
QNLGNEWAV	Non-CPP
ACKEYGQRI	Non-CPP
QVFSKTSGE	Non-CPP
VGRALSSNL	Non-CPP
SENPSNSRN	Non-CPP
IPDMIQGQV	Non-CPP
EASDIGGQG	Non-CPP
KIFFQNRFM	Non-CPP
TSFGNLSNA	Non-CPP
HDFDQDDVN	Non-CPP
LNFLNAAVT	Non-CPP
FPTISLEFR	Non-CPP
PEVLKSQGG	Non-CPP
FAVKTLLEK	Non-CPP
LYPGKGIKN	Non-CPP
DWLNKGKEW	Non-CPP
ATGKPHTLW	Non-CPP
WKSFDEDLD	Non-CPP
RWDRFGRRN	Non-CPP
CKFQFLNFC	Non-CPP
VVDPGVIPR	Non-CPP
CIIALWMYN	Non-CPP
GRVYRPCWQ	Non-CPP
SSPVLTKRL	Non-CPP
YFHGWPNQE	Non-CPP
DENDFHLLN	Non-CPP
GPPGPPGAP	Non-CPP
DSHCRGMGR	Non-CPP
QNELRREQE	Non-CPP
YGGFMKPYT	Non-CPP
QLQQFSRMS	Non-CPP
GEEDRDVGV	Non-CPP
VGSEKALDA	Non-CPP
LRVAHREHT	Non-CPP
SCIALQDLM	Non-CPP
KGVAKEAGL	Non-CPP
IPIAGEEEV	Non-CPP
DDEEVLLKA	Non-CPP
RAALNAVTG	Non-CPP
ELQLRGAAI	Non-CPP
AGIWSYQCW	Non-CPP
ARSLAKYHP	Non-CPP
MGPCSFARY	Non-CPP
ALNCSITPW	Non-CPP
VSEYISFIT	Non-CPP
KTQPLACDH	Non-CPP
RGDGGRPET	Non-CPP
SCFCLCCPR	Non-CPP
CCHNTQLPF	Non-CPP
LCLPSFDKL	Non-CPP
FFLFAVLFC	Non-CPP
AKLFAHTGS	Non-CPP
AVFNFISQQ	Non-CPP
ITNQSFNIA	Non-CPP
TGARHLDNH	Non-CPP
VVPTVSYEC	Non-CPP
TSGSLKSKI	Non-CPP
KKNPRFKQR	Non-CPP
LSSNGILDL	Non-CPP
RSQSKKLGK	Non-CPP
GICSLYQEN	Non-CPP
QHLCGSHLV	Non-CPP
YKDKECVYY	Non-CPP
DRCYSTQSM	Non-CPP
SIKLYYMCQ	Non-CPP
ECLDRIGDE	Non-CPP
FHVHTDGYH	Non-CPP
RYDNPGRFN	Non-CPP
NFLMYMTTE	Non-CPP
ESSSALQAA	Non-CPP
YSVCQDDGF	Non-CPP
CVTLVWRMP	Non-CPP
ERQIKFWFQ	Non-CPP
GIGTFLSGI	Non-CPP
GYNPMQDPN	Non-CPP
CGIGERCRE	Non-CPP
TPESFVWND	Non-CPP
CARIFGPTK	Non-CPP
DNPYSFPKD	Non-CPP
LASALCTFV	Non-CPP
SPLCRDTKP	Non-CPP
SMTLRQCHN	Non-CPP
PGFSPFRGK	Non-CPP
RKSARKWNN	Non-CPP
IAPEGSTLK	Non-CPP
IMDILAKLG	Non-CPP
LGGLLADVV	Non-CPP
CLLLLGCGY	Non-CPP
SIWMSVEDH	Non-CPP
LPRHIRTHT	Non-CPP
ASTLSSNGI	Non-CPP
SSFLSPEFK	Non-CPP
KWLMKRLYM	Non-CPP
FWKSPAVFN	Non-CPP
SILESMYKL	Non-CPP
FCDGDNDDC	Non-CPP
DSKIDHYVL	Non-CPP
NLKALLAVA	Non-CPP
NGQRKNSRD	Non-CPP
CCSTPPCAV	Non-CPP
PADINKEEE	Non-CPP
TLRLNNVTL	Non-CPP
TQKLYQTLD	Non-CPP
EEFEKILGI	Non-CPP
CCKNSSCGL	Non-CPP
STVKPIVIM	Non-CPP
ENIAYLDFR	Non-CPP
SDEELPLFL	Non-CPP
GCCSDPRCR	Non-CPP
SNAAAIQSN	Non-CPP
KIQQQNDPT	Non-CPP
GDQYYGFPA	Non-CPP
FPACTHTII	Non-CPP
RFESIRLPG	Non-CPP
RNGLPVCGE	Non-CPP
VEAGFGTHG	Non-CPP
PSGKGRGLQ	Non-CPP
VIKHDASID	Non-CPP
AEEVEQKQL	Non-CPP
GWTLWSAGY	Non-CPP
CGRHLLIEV	Non-CPP
LNVPGEIVE	Non-CPP
PDNVDVDDQ	Non-CPP
RHGRRFGLR	Non-CPP
ALQRDYEAG	Non-CPP
FSPDMLSLR	Non-CPP
LIKCAYQLI	Non-CPP
PCKSESDGN	Non-CPP
NRWWQGVVP	Non-CPP
LAYLLDKNL	Non-CPP
SGIEEELQK	Non-CPP
SDTSSCTSQ	Non-CPP
MCQCGFYVY	Non-CPP
DERRQLNKI	Non-CPP
KSKVTVRIG	Non-CPP
GKGRGLQHP	Non-CPP
PSPTPTPGP	Non-CPP
HSHLHAISV	Non-CPP
GVAMNPVDH	Non-CPP
LGMGVDRVV	Non-CPP
SVMQVPRVE	Non-CPP
LRSKIWLWV	Non-CPP
FAQTQSLVY	Non-CPP
RVLPPTRAT	Non-CPP
ACMKGMSYG	Non-CPP
IGRNESQKK	Non-CPP
LRRIRFARK	Non-CPP
AAAMRAAWP	Non-CPP
KTPEVWECL	Non-CPP
ESNIHELRT	Non-CPP
KAPYNIHWH	Non-CPP
YGGGGLVGA	Non-CPP
YLDSAATTH	Non-CPP
VETLYSVCQ	Non-CPP
QYFPHDIVL	Non-CPP
DEYRTYKLL	Non-CPP
ESILPQQKS	Non-CPP
LCGKYKRMK	Non-CPP
ILALEKKEE	Non-CPP
RDSCGCGDS	Non-CPP
RRSPSPTPT	Non-CPP
NELRREQEQ	Non-CPP
AYEKYKLLE	Non-CPP
DKLKKGASD	Non-CPP
DDFGDYSAN	Non-CPP
GLVPNLLNN	Non-CPP
VSQRLCGSQ	Non-CPP
GSHTEHTTY	Non-CPP
SGQYFLPQF	Non-CPP
IHEYKRQLL	Non-CPP
VPCYFIYGN	Non-CPP
TGYLLGPPP	Non-CPP
IQYKEGFGH	Non-CPP
GDLLKGVAK	Non-CPP
SHVTLPQVR	Non-CPP
TVLGAELAE	Non-CPP
IPFVLNLDS	Non-CPP
WTKMKGAGK	Non-CPP
GYHTEPDIY	Non-CPP
KEQRQKGSA	Non-CPP
YTHRSCNKV	Non-CPP
ADNCVTLVW	Non-CPP
MRVYRPCWQ	Non-CPP
VSRKRHAGK	Non-CPP
ISALRAIGA	Non-CPP
TGYGPLHFA	Non-CPP
HINHLCGLI	Non-CPP
GCSNAGAFC	Non-CPP
RDTKPMYRP	Non-CPP
HGRLCEAVG	Non-CPP
VVPLEERMK	Non-CPP
ERGESIIVE	Non-CPP
KALTKNVTL	Non-CPP
NLLRFFVAP	Non-CPP
TFTDYVDRF	Non-CPP
EGFGHLSPT	Non-CPP
CSGFETSGI	Non-CPP
FLISNALFW	Non-CPP
YFQQLDEVD	Non-CPP
VQQGNRDYP	Non-CPP
YQSPGDPTN	Non-CPP
QSLKERQGK	Non-CPP
NQILTKYLP	Non-CPP
YSPTEWKYY	Non-CPP
LDPQDPNSA	Non-CPP
EQTVNPPMS	Non-CPP
SRELVRTQI	Non-CPP
HGIHKLFHT	Non-CPP
NNHSHLHAI	Non-CPP
KIDVERAVE	Non-CPP
PPYGLFVGG	Non-CPP
PLLLFLAAI	Non-CPP
SQLVDTLYS	Non-CPP
DTVELVMAF	Non-CPP
SITPMGIAD	Non-CPP
AKAVIGAAL	Non-CPP
EVLQDSLDR	Non-CPP
PVVLMTKKR	Non-CPP
TECLHTFCK	Non-CPP
RAGGGPTLQ	Non-CPP
LAYGFLTPF	Non-CPP
RGNASGLGA	Non-CPP
LTFMKRLFC	Non-CPP
ILLCIATVF	Non-CPP
LVICSTGFS	Non-CPP
SRCQLTVGD	Non-CPP
RVGAVAGST	Non-CPP
VAAKVGPAV	Non-CPP
DHPHGGGEG	Non-CPP
RFVQAGSEV	Non-CPP
AINDEMEMV	Non-CPP
KLCSRELVR	Non-CPP
SKTDSNFDW	Non-CPP
SIPPKPCSG	Non-CPP
GLNRLVVAG	Non-CPP
TALPTWGLA	Non-CPP
PCPDSCRYL	Non-CPP
DLPLADLAA	Non-CPP
PAAADHSRT	Non-CPP
YQRDNFILR	Non-CPP
CLCAALSVF	Non-CPP
NSRTIADNV	Non-CPP
LMKRLYMVR	Non-CPP
VVLEQSYGN	Non-CPP
ALANLTDAT	Non-CPP
ATNAVHRCC	Non-CPP
RRAGPLDGL	Non-CPP
KLMYDCCSG	Non-CPP
EVRVAGRVM	Non-CPP
GHIWNAVKR	Non-CPP
EDQLVRVGA	Non-CPP
VASDWSIHL	Non-CPP
GVKIIGGAA	Non-CPP
SDYDETALV	Non-CPP
WWFFLARTD	Non-CPP
LLADKRPAR	Non-CPP
PPPAPCFSQ	Non-CPP
MLRCMLMRV	Non-CPP
LPLDVYDLT	Non-CPP
HGAVTGALS	Non-CPP
LPSWLLRAD	Non-CPP
NGKRVCVCR	Non-CPP
AALMFMNWV	Non-CPP
AASAASTEA	Non-CPP
ENYLPSPCQ	Non-CPP
SPRDSHCRG	Non-CPP
DGQWFCISW	Non-CPP
LSKSSSKGG	Non-CPP
PMFRRRRYN	Non-CPP
NNELRLTRD	Non-CPP
LGAAREHVQ	Non-CPP
HWPVAKLFV	Non-CPP
PQDLSRRDF	Non-CPP
IGEIDRALR	Non-CPP
GQRISALRA	Non-CPP
SDMFRPSGD	Non-CPP
TFWLIMNLV	Non-CPP
RYPECQPSK	Non-CPP
EWILKGAQP	Non-CPP
AVDMSFFYA	Non-CPP
FLVLVNDSN	Non-CPP
FGMEQEYTL	Non-CPP
SSAFSGNHS	Non-CPP
TWACLLLLG	Non-CPP
LSNIKENKC	Non-CPP
KASRGDQES	Non-CPP
SRPLVSFRY	Non-CPP
ALWKDMLSG	Non-CPP
RRIRFARKL	Non-CPP
TILVHSAWA	Non-CPP
VWIPCISSV	Non-CPP
MFAPKFHPA	Non-CPP
KQRQGMRSR	Non-CPP
LNAVTGMVN	Non-CPP
GAIHGGRFI	Non-CPP
NVLVVLALL	Non-CPP
VKQHPVLLN	Non-CPP
NVPLRDAKA	Non-CPP
GLLQADIVL	Non-CPP
NNKSSMVLP	Non-CPP
KFGFTSRKA	Non-CPP
DPDTTPKQV	Non-CPP
KEKDDNSSG	Non-CPP
NLTETHNFS	Non-CPP
VNGSYESLS	Non-CPP
LLYSRKEGQ	Non-CPP
PEREGVYDE	Non-CPP
LALMHAGVP	Non-CPP
IMIDPKMLE	Non-CPP
KAGTALGKV	Non-CPP
ALPFLARNT	Non-CPP
FQQDTYMSH	Non-CPP
VYSIWMSVE	Non-CPP
TQQLIRAAE	Non-CPP
LAAGIDLGT	Non-CPP
ISVIRSKRV	Non-CPP
REFERRQNE	Non-CPP
TKALGHSYG	Non-CPP
TVPQGGMEM	Non-CPP
GKFLPLILR	Non-CPP
GKPSFNPAD	Non-CPP
RVVPKVICL	Non-CPP
HTVEDIGIV	Non-CPP
ADMEKALAA	Non-CPP
LRITLSATH	Non-CPP
FLTPRSIAV	Non-CPP
GRLQSLQTY	Non-CPP
GWSVYEGRC	Non-CPP
RVVELSQEH	Non-CPP
TSICSLYQL	Non-CPP
QTALYHIAE	Non-CPP
CIALTLVLV	Non-CPP
DMAPAGAGA	Non-CPP
GQLLADKRP	Non-CPP
LLILTCLVA	Non-CPP
SYDRKKRRQ	Non-CPP
VLLKKIFCA	Non-CPP
SSIGSILGK	Non-CPP
VERLQIEAG	Non-CPP
HAIQNMAGD	Non-CPP
VFTDNYTRL	Non-CPP
GLAPSGKGR	Non-CPP
AVQMTDFMH	Non-CPP
FGECDSEVD	Non-CPP
VLGVGKKVD	Non-CPP
STRRKNKQK	Non-CPP
FGPTKDYEC	Non-CPP
RIGKGVKII	Non-CPP
FGAYPVAAK	Non-CPP
EITNQSFNI	Non-CPP
EISERVKDA	Non-CPP
GRALANLTD	Non-CPP
GLIQTIKEK	Non-CPP
GRAALNAVT	Non-CPP
RLCGSQLVD	Non-CPP
SKIKDVAAA	Non-CPP
ANFLIHSSN	Non-CPP
LSPEFKKIQ	Non-CPP
KLCGQSDWS	Non-CPP
EGIAIAIKG	Non-CPP
LNASGETVE	Non-CPP
DQKCLLQKY	Non-CPP
DESLESTRR	Non-CPP
RGLWENIAY	Non-CPP
QPQQPFPQS	Non-CPP
GEKNMEIIL	Non-CPP
VKQSLAPCL	Non-CPP
IIFTELRES	Non-CPP
DQVLETLDK	Non-CPP
RNDNPPVLG	Non-CPP
IVAVLFLTA	Non-CPP
EGSSEPEEW	Non-CPP
DEVDGEDRV	Non-CPP
SQKKDNVYK	Non-CPP
DTLKHFLKL	Non-CPP
LFAALNFSS	Non-CPP
VGLSGGVDS	Non-CPP
QYMACVTPE	Non-CPP
TLISDLLMR	Non-CPP
LKALAALAW	Non-CPP
SPFRGKFHS	Non-CPP
VWPGALPGG	Non-CPP
NLSECFWKY	Non-CPP
KEITLLTTS	Non-CPP
MTILQFGNG	Non-CPP
KFALIDTTL	Non-CPP
KIHPFAQTQ	Non-CPP
GQPPTHFKQ	Non-CPP
SIRRYDEQF	Non-CPP
AEALRCQEN	Non-CPP
KKIVEEKDA	Non-CPP
TVSYECRMN	Non-CPP
FCQETGMTL	Non-CPP
STKEIVNTA	Non-CPP
PETEYVVNV	Non-CPP
EASPVEVRV	Non-CPP
AVNDFLTPR	Non-CPP
KTSQRACET	Non-CPP
QMTDFMHDM	Non-CPP
YGLPSRDMS	Non-CPP
ASPTPASDV	Non-CPP
STQQTTLLL	Non-CPP
NLAPLMRVG	Non-CPP
WFPMLENPV	Non-CPP
QSPCEKMKV	Non-CPP
IGMFADFID	Non-CPP
GSTDDISIV	Non-CPP
KGSASTLSS	Non-CPP
PDERRQLNK	Non-CPP
FKDDKSIFV	Non-CPP
QQQFLGQQQ	Non-CPP
DSEEAIRYR	Non-CPP
YVSADEASL	Non-CPP
SLSSLGESL	Non-CPP
GMTSLGSVC	Non-CPP
YRVFDEPKK	Non-CPP
PDSCRYLCC	Non-CPP
GANVLGGAP	Non-CPP
ILEKAERIG	Non-CPP
TFTRAQLDI	Non-CPP
PWWWLWVIM	Non-CPP
FYSVAYSEH	Non-CPP
EELHQKRLQ	Non-CPP
HKILGYTVI	Non-CPP
PVRREIGIR	Non-CPP
STVAFLASV	Non-CPP
DSGCFGRRL	Non-CPP
GVAAGWDDV	Non-CPP
LKKYWDNGM	Non-CPP
ASDSEYSAE	Non-CPP
PHSPIEGFW	Non-CPP
AKEGRLPDA	Non-CPP
CSQDCLVCI	Non-CPP
PVEVRVAGR	Non-CPP
ADSVARRSC	Non-CPP
LHMEDSLKH	Non-CPP
PARVDFSLA	Non-CPP
CRCVCTRGF	Non-CPP
FTSFGNLSN	Non-CPP
GEKDESLVR	Non-CPP
KPNPERFYA	Non-CPP
ISLFWWMES	Non-CPP
RAMDSPLIR	Non-CPP
LFNAALKLL	Non-CPP
NSAPTTSSS	Non-CPP
VREVKMETL	Non-CPP
VEVHIDNLQ	Non-CPP
QDISRAGKN	Non-CPP
IVPETDTQV	Non-CPP
KPLNCMNYF	Non-CPP
VPYSKSTVN	Non-CPP
WTYQSPGDP	Non-CPP
ATNQIVMNC	Non-CPP
GIKYWAFMF	Non-CPP
FVTTDSGSG	Non-CPP
PKRAPSGFL	Non-CPP
ESGGPEPGV	Non-CPP
AKGRTVRFG	Non-CPP
SGGVDSSTA	Non-CPP
RGGQKILEK	Non-CPP
VTHDKMRHC	Non-CPP
QETYLRSRK	Non-CPP
DPQDPNSAH	Non-CPP
KRELEHWCT	Non-CPP
APTTRNLLT	Non-CPP
SPPDLDPQD	Non-CPP
TALGKVAKA	Non-CPP
EIEAPQAVL	Non-CPP
GLPTLISWI	Non-CPP
ALKAALKMA	Non-CPP
TLKHFLKLE	Non-CPP
YDAHGVAIS	Non-CPP
SEICIVWCT	Non-CPP
TTDSGSGLV	Non-CPP
VKLYSFNLG	Non-CPP
GLGCNVLRR	Non-CPP
TQRFFTSFG	Non-CPP
NDALGALRL	Non-CPP
KIIRRLIK-	Non-CPP
DVVKSKGQP	Non-CPP
NEAYQILSD	Non-CPP
PFRHTELFQ	Non-CPP
FGPLTWVCK	Non-CPP
GYLLGKQLA	Non-CPP
VKFLKVKKD	Non-CPP
LSHGAQLFL	Non-CPP
TPFFLFQQD	Non-CPP
ASEEKLEQV	Non-CPP
VIMSQPRHV	Non-CPP
RPQAPRPGA	Non-CPP
AEALQQALE	Non-CPP
MDDGTEPNV	Non-CPP
VPWCEFSDE	Non-CPP
RGQLSRAYN	Non-CPP
NPGRFNGKA	Non-CPP
IDEQEDKPL	Non-CPP
ILTPGVTNV	Non-CPP
IGLDMSRAR	Non-CPP
AKKLKEYME	Non-CPP
AIHGGRFIH	Non-CPP
SYGLPSRDM	Non-CPP
ASQIGRSTA	Non-CPP
LGDILGLLG	Non-CPP
QENRPPFPP	Non-CPP
NVYSVVEDE	Non-CPP
NQELKLSIK	Non-CPP
KGYFKESRL	Non-CPP
ACSQGWYDL	Non-CPP
IEQMMACRE	Non-CPP
KSKQAIQKK	Non-CPP
YGGVPVIIT	Non-CPP
SKILGNNLV	Non-CPP
EYNRGKRNL	Non-CPP
RKLPETLSK	Non-CPP
GDPEAWRKW	Non-CPP
GSVGASGDL	Non-CPP
RRALKETGL	Non-CPP
ANRRKWEEL	Non-CPP
IPRPQAPRP	Non-CPP
PAGSDESWT	Non-CPP
VEKVVCTYR	Non-CPP
PQANSAPCT	Non-CPP
PVQTAFVDN	Non-CPP
TVAMQYDQT	Non-CPP
YTLLGTDGH	Non-CPP
GQPMHAFDL	Non-CPP
NQPAADAFR	Non-CPP
AARLAEKAM	Non-CPP
AWHGKPLPK	Non-CPP
AAIQSNAQV	Non-CPP
FNSESTRRK	Non-CPP
FGTDGIRGK	Non-CPP
YLCPEMEEV	Non-CPP
LTAVLAGGW	Non-CPP
LAFLSETET	Non-CPP
VEAGFGCPS	Non-CPP
VTMVEAGFG	Non-CPP
GNNRPVYIP	Non-CPP
YCNSSDIMD	Non-CPP
PAKSAQSSK	Non-CPP
HIWRRSYDI	Non-CPP
KNKCTVDWA	Non-CPP
LKAKALCEA	Non-CPP
IGPITWVCG	Non-CPP
NSSSSGSSG	Non-CPP
VHSLQSFDR	Non-CPP
YWDNGMTSL	Non-CPP
LVDCIRNCI	Non-CPP
CHRRDSHKI	Non-CPP
FGSSNAGNG	Non-CPP
DIRSIDEQE	Non-CPP
GLTAASFTS	Non-CPP
PTPASDVYS	Non-CPP
ALPHVINAI	Non-CPP
QMVKEVSSQ	Non-CPP
PMSLTHHQW	Non-CPP
VGPAVFCAI	Non-CPP
ESTVSAEPR	Non-CPP
ALTLALVAN	Non-CPP
KDGYPVEYD	Non-CPP
STEKIGDLF	Non-CPP
TFFLQLEGF	Non-CPP
PPPPAPCFS	Non-CPP
TEEEIEIIK	Non-CPP
GNSRKSNPK	Non-CPP
AAEALLKRR	Non-CPP
LDFRCHPAD	Non-CPP
IQELAEKDE	Non-CPP
VHAKCHHIH	Non-CPP
PAENDALKI	Non-CPP
EKALHSFII	Non-CPP
MVKEVSSQT	Non-CPP
KKRRWKKAK	Non-CPP
TIKEKLKEL	Non-CPP
LRCRVVFQN	Non-CPP
LCSRELVRT	Non-CPP
PANAQITRK	Non-CPP
AAAAAKAAR	Non-CPP
DKFFIYVIE	Non-CPP
IRTHTGEKP	Non-CPP
RSVCSHVVR	Non-CPP
QSHKPLITL	Non-CPP
EHWCTHGKY	Non-CPP
PGGPRGVNP	Non-CPP
AAALAVILI	Non-CPP
LDKYKNAVT	Non-CPP
EDNFYKWTA	Non-CPP
EQRKTIYKF	Non-CPP
KKALVASDG	Non-CPP
QKLAGAWAS	Non-CPP
IDRLITGRL	Non-CPP
QNRIIFDSV	Non-CPP
QVKFKRRRE	Non-CPP
YISPEVLKS	Non-CPP
TLEMAAYQE	Non-CPP
DYDRPIMAF	Non-CPP
CREGGEFCG	Non-CPP
LALTGGIAT	Non-CPP
QHPVLLNRA	Non-CPP
IVISKTDSN	Non-CPP
KLAGAWASE	Non-CPP
DSAVEIVRV	Non-CPP
GKKFLKVDE	Non-CPP
PPPKPETPQ	Non-CPP
GSTLKETNQ	Non-CPP
QHRPVALTN	Non-CPP
EAPQAVLPN	Non-CPP
PHDIVLQST	Non-CPP
KVDEATRED	Non-CPP
PPVLEPQGA	Non-CPP
KLAKNHDMV	Non-CPP
GFIGIRKSA	Non-CPP
RWGQPPTHF	Non-CPP
AGPLDGLIG	Non-CPP
KLRCKVTGG	Non-CPP
PYNIHWHCK	Non-CPP
KRGGAQYAP	Non-CPP
KMWWFFLAR	Non-CPP
HLREQSRKP	Non-CPP
LNAAVTRTA	Non-CPP
MHQEYLQGL	Non-CPP
RFCQKLAKN	Non-CPP
RVAEWDSTE	Non-CPP
HLDIIWINT	Non-CPP
DFPIFRNQK	Non-CPP
YIEFCKGTF	Non-CPP
HVAKQFLGS	Non-CPP
NHTVGDLTW	Non-CPP
KISTSRNWA	Non-CPP
ISEGIAIAI	Non-CPP
TNERHPKLI	Non-CPP
VIASSDLVW	Non-CPP
DIKPANMEE	Non-CPP
PLQTYKELI	Non-CPP
KPPCRGCSS	Non-CPP
AEPFLLNVN	Non-CPP
LAKEGRLPD	Non-CPP
VMMITGRSI	Non-CPP
LHVIVRETT	Non-CPP
RRTQALILK	Non-CPP
LGTQWAVGH	Non-CPP
SRRGPSLGA	Non-CPP
ANINLAFSS	Non-CPP
KSFIGSLEL	Non-CPP
TAALRRLSQ	Non-CPP
SKHARRPSK	Non-CPP
YDNKTLFAA	Non-CPP
EATVFGLWP	Non-CPP
NGIASYLHY	Non-CPP
RLAAGIDLG	Non-CPP
TQRGSEHGD	Non-CPP
QAMCHLVWK	Non-CPP
PKVNQPSLC	Non-CPP
LFLAVLLVS	Non-CPP
NCFLELPEV	Non-CPP
KMSMKIRPF	Non-CPP
EALFAKTRY	Non-CPP
LKETNQNLD	Non-CPP
SDHKAIEHP	Non-CPP
YGFPAENDA	Non-CPP
KLLMLHNQQ	Non-CPP
GSASTLSSN	Non-CPP
WPVCTRNGV	Non-CPP
GNLFGGHTF	Non-CPP
LQFGTEPFT	Non-CPP
FGDYSANWG	Non-CPP
GLVNERGKV	Non-CPP
ESLYWRVVA	Non-CPP
AVTRTAYKR	Non-CPP
NTKNDFMRF	Non-CPP
REASDIGGQ	Non-CPP
RSRQHIKLD	Non-CPP
CIGRNESQK	Non-CPP
AYRSPLCRD	Non-CPP
TGINVPYSK	Non-CPP
VPSRLQPGS	Non-CPP
HELCHYCKM	Non-CPP
DRDIAPEGS	Non-CPP
LMSFLITQK	Non-CPP
KLVVVGDGG	Non-CPP
RHLLIEVIK	Non-CPP
FGSLDPPNM	Non-CPP
TSTANVVLC	Non-CPP
KALLAVAKK	Non-CPP
MEAPSQRPN	Non-CPP
RKSPSRRNR	Non-CPP
LLAAWTKTL	Non-CPP
PLLNLKEVI	Non-CPP
SEDLLYLEF	Non-CPP
ALLIKQNLK	Non-CPP
VTMLLGKLF	Non-CPP
KNLATLYSI	Non-CPP
LSQLVGQQV	Non-CPP
KYVMGHFRW	Non-CPP
HPHGGGEGR	Non-CPP
IPPKPCSGK	Non-CPP
MMRDSGCFG	Non-CPP
FQEDPQTEA	Non-CPP
AADHSRTPS	Non-CPP
GKKDEEAKA	Non-CPP
FAASDRFGT	Non-CPP
SSMATVCGS	Non-CPP
VDQVMVTLN	Non-CPP
LRTAILNAK	Non-CPP
EQEQRREEL	Non-CPP
CFFERVTSG	Non-CPP
THEAVRVSW	Non-CPP
PSARPSKTD	Non-CPP
IVYVCSSLL	Non-CPP
GESLESGIS	Non-CPP
IPLAISAIS	Non-CPP
SVDFKKNWI	Non-CPP
LVPAMFCRA	Non-CPP
SKVQISELS	Non-CPP
QETENFLVN	Non-CPP
YGQRIVLGL	Non-CPP
ATLGNLALP	Non-CPP
EDSHSSSVR	Non-CPP
PSSAFSGNH	Non-CPP
YLFMLIVAG	Non-CPP
ITYLEEAGA	Non-CPP
QQLIRAAEI	Non-CPP
GGVNLAQKF	Non-CPP
FNRRIMDTI	Non-CPP
MGHFRWDRF	Non-CPP
KVLLTGTPL	Non-CPP
SCIALTLAL	Non-CPP
GAKGECHLA	Non-CPP
STCVPVAAD	Non-CPP
DLNRQGTPL	Non-CPP
LRDIKAENT	Non-CPP
RSPSPTPTP	Non-CPP
KSLHYYYVT	Non-CPP
WRPVTGAVP	Non-CPP
SITPWGRFA	Non-CPP
RCQENYLPS	Non-CPP
KHHPYIEHG	Non-CPP
MPCGFGLFG	Non-CPP
LNNTTIEKE	Non-CPP
LPLADLAAS	Non-CPP
AVFCAITQK	Non-CPP
NALGIYLPL	Non-CPP
WRRKLKALA	Non-CPP
QQNDPTKTT	Non-CPP
LCMAKPLSI	Non-CPP
ATVCGSSLA	Non-CPP
LIIAEERVA	Non-CPP
PSAIDLACL	Non-CPP
THNFSSTNL	Non-CPP
GAEKPYICN	Non-CPP
KQANPTTDK	Non-CPP
DGPTTRFCQ	Non-CPP
LQHPPPVGS	Non-CPP
KLENSAKKR	Non-CPP
KDARGLLSG	Non-CPP
RIIFDSVGK	Non-CPP
KKLMTEFNY	Non-CPP
IADDMPCGF	Non-CPP
KGVKKYFSF	Non-CPP
TLRQCHNPS	Non-CPP
AVDFFKGLF	Non-CPP
VVNVYSVVE	Non-CPP
QFNAADDSR	Non-CPP
VCTRNGVPI	Non-CPP
AIEAIENGV	Non-CPP
NSVHISHQE	Non-CPP
RGMPSWRDW	Non-CPP
PSPAPPYGL	Non-CPP
MLENPVKTQ	Non-CPP
VIPRNLHQM	Non-CPP
EKALDAATV	Non-CPP
GLGIICKQC	Non-CPP
TLYNSDTER	Non-CPP
ALLKALGFP	Non-CPP
MPPTGGLGM	Non-CPP
NTLLTKEGV	Non-CPP
HDIVLQSTN	Non-CPP
DGRVYRPCW	Non-CPP
LGIICKQCY	Non-CPP
LLCCLVLLT	Non-CPP
EQVVADVLV	Non-CPP
GKALSYNNI	Non-CPP
ALDAATVEK	Non-CPP
VDEDLQGAG	Non-CPP
SAGYLLGKQ	Non-CPP
YYGFPAEND	Non-CPP
LDLPCRYKN	Non-CPP
PPSSPEKAA	Non-CPP
GIDYRKGLS	Non-CPP
KQLAALAKK	Non-CPP
ICSLYQLEN	Non-CPP
LLASALCTF	Non-CPP
DAFRKQLEK	Non-CPP
TQSQRERAE	Non-CPP
KCCQVGCIR	Non-CPP
EGQLGENNE	Non-CPP
GARMLKAAG	Non-CPP
AVVTDKVNV	Non-CPP
GSYESLSGG	Non-CPP
DAVIACVGG	Non-CPP
ERRKLPPGP	Non-CPP
SPQMLDQVG	Non-CPP
PVVVMVLEG	Non-CPP
SAGPAMTAE	Non-CPP
LQTYVTQQL	Non-CPP
FVLPDNVDV	Non-CPP
YQKFAWPQY	Non-CPP
SPMCYSPTE	Non-CPP
YGRVVLENH	Non-CPP
KQNEQMHAL	Non-CPP
KIEITSIDE	Non-CPP
KDNVYKFKE	Non-CPP
LGKALKAAL	Non-CPP
PEEELEGSS	Non-CPP
RGQQQLRRP	Non-CPP
GCRSVCSHV	Non-CPP
AALAASSCG	Non-CPP
LSASELTSP	Non-CPP
AKGECHLAV	Non-CPP
LVGMTPEII	Non-CPP
TKTLEASVK	Non-CPP
VTGRAPKPA	Non-CPP
VQMTDFMHD	Non-CPP
ADAFRKQLE	Non-CPP
LQALAKKIL	Non-CPP
KKDIQDALI	Non-CPP
RIIQDGSLD	Non-CPP
TTPVWMMRQ	Non-CPP
VALHAGKAA	Non-CPP
AQYAPYWQE	Non-CPP
LLAASVEWF	Non-CPP
TSRNGPESS	Non-CPP
KLTGKQVQL	Non-CPP
ATREDMLMS	Non-CPP
ILTGRAKEF	Non-CPP
NIHTYEGGT	Non-CPP
CSDPRCRYR	Non-CPP
VKKYLNSIL	Non-CPP
ERKLLRERL	Non-CPP
GCSSGKCVN	Non-CPP
WEQTVNPPM	Non-CPP
HPTAQDYNK	Non-CPP
HHPYIEHGN	Non-CPP
GGKESLYWR	Non-CPP
GTTNSLVAT	Non-CPP
DISPPDLDP	Non-CPP
WSDSRCQLT	Non-CPP
QKRLQVSAA	Non-CPP
KVAKKLVSH	Non-CPP
VIKLCSREL	Non-CPP
KWIKPKVNQ	Non-CPP
GDAIEAIEN	Non-CPP
HGSCSSSKG	Non-CPP
LALNCSITP	Non-CPP
TNFPICLFC	Non-CPP
YIPQPRPPH	Non-CPP
VTPPPKPET	Non-CPP
PAYCEASGC	Non-CPP
ELPNGDQYY	Non-CPP
KAFETPSSG	Non-CPP
PEAVEAEAT	Non-CPP
EEAIRYRQE	Non-CPP
YQEESEPKR	Non-CPP
LKNDRLLKA	Non-CPP
SALEPGFLV	Non-CPP
TKNKCTVDW	Non-CPP
KTKKPLVIC	Non-CPP
DEALGRLES	Non-CPP
LVCIPCCPN	Non-CPP
VPPERDNAY	Non-CPP
GIYLPLITV	Non-CPP
EGVHRFSLV	Non-CPP
EACRRGDRM	Non-CPP
TPAPTPVPE	Non-CPP
PVVNPPFLQ	Non-CPP
KPLKVEGVE	Non-CPP
LEHPVEISP	Non-CPP
LSKADLIRA	Non-CPP
NIVCECCMK	Non-CPP
NGLKVGPLK	Non-CPP
GKINLKALQ	Non-CPP
SVCSHVVRN	Non-CPP
NTGSLTANP	Non-CPP
QVLETLDKG	Non-CPP
QVGLSHGAQ	Non-CPP
EKLLFDLFS	Non-CPP
QGAGGIQSR	Non-CPP
GLLSEMLPQ	Non-CPP
SSILDPHHS	Non-CPP
FAESAEDGP	Non-CPP
SHEQARSSA	Non-CPP
CVSEYISFI	Non-CPP
SVLVLRKPG	Non-CPP
TRSEMESIL	Non-CPP
AAPKVPVKR	Non-CPP
ASDHKAIEH	Non-CPP
LILALEKKE	Non-CPP
LCRPLSCAQ	Non-CPP
QKGSASTLS	Non-CPP
ITKDFLTFM	Non-CPP
KKAVRRQEA	Non-CPP
HVINAIKNT	Non-CPP
NVVTDGNVI	Non-CPP
ISSCDIIIS	Non-CPP
LLQADIVLV	Non-CPP
WVHAKCHHI	Non-CPP
KLYQTLDKP	Non-CPP
YFHTLRYEG	Non-CPP
GPATLSVSN	Non-CPP
NPVKTQISV	Non-CPP
SGKRSGSPD	Non-CPP
AASPRNSVL	Non-CPP
PLSCAQEVL	Non-CPP
EPEKIPDII	Non-CPP
PICLCDEPG	Non-CPP
EDIFVTVGR	Non-CPP
TTSSSTKET	Non-CPP
QEQRREELL	Non-CPP
CPFPACTHT	Non-CPP
VELSQEHLP	Non-CPP
YLQGLATNA	Non-CPP
AATPATAAT	Non-CPP
GFYVYGVAA	Non-CPP
PQPQQPFPQ	Non-CPP
VKKEEMKYF	Non-CPP
CNYRDVRFE	Non-CPP
QASAPSSPG	Non-CPP
GPKTQPLAC	Non-CPP
CNLATWTKK	Non-CPP
GYRFCCPNF	Non-CPP
GCFIPGCSC	Non-CPP
LLADTQSGH	Non-CPP
DWFHYEGHC	Non-CPP
QCGMSEKEE	Non-CPP
KMLELSIYE	Non-CPP
TSGDPIRRR	Non-CPP
LSCAQEVLR	Non-CPP
YMTTEQCTS	Non-CPP
KTAPLLIAA	Non-CPP
YKYEMINKQ	Non-CPP
LEEAGAYEN	Non-CPP
YLLVPAMFC	Non-CPP
LKVDEATRE	Non-CPP
TNITSVAAV	Non-CPP
LLDKNLPKE	Non-CPP
GRTAAGETL	Non-CPP
PDHAFAVKT	Non-CPP
NLIGQFGVG	Non-CPP
GALSEKERK	Non-CPP
LRPVMDNQN	Non-CPP
NFLPKIFCA	Non-CPP
CQKLAKNHD	Non-CPP
REQSRKPPN	Non-CPP
GHLAGRPES	Non-CPP
MLKAAGATI	Non-CPP
LPLILRKIV	Non-CPP
VICLITKKC	Non-CPP
DTVIMASVF	Non-CPP
AQWPRPTPQ	Non-CPP
DLRINLWNF	Non-CPP
YAHYVNLSC	Non-CPP
NLVETLYSV	Non-CPP
NIHWHCKPG	Non-CPP
VWMNWKGSW	Non-CPP
QKILEKAER	Non-CPP
EFAESAEDG	Non-CPP
YLIDHISKY	Non-CPP
LITLIVVYG	Non-CPP
LGNQNAVGH	Non-CPP
ASDGNVEEA	Non-CPP
ATRTLISYV	Non-CPP
LLGKAKRII	Non-CPP
DDGRDPRGL	Non-CPP
LSELEQMWL	Non-CPP
RQSSKQVKA	Non-CPP
TGYGKDMVK	Non-CPP
IVCAATKKC	Non-CPP
TAGKLLGNL	Non-CPP
EKVYPGLLA	Non-CPP
LKIGANVLG	Non-CPP
LDSLKCKIT	Non-CPP
LWDVGHQSY	Non-CPP
QPGSHGSVR	Non-CPP
TEFAESAED	Non-CPP
PCRGCSSYL	Non-CPP
ITLNFLMNL	Non-CPP
KEGGLDPDM	Non-CPP
PRRVLDVEV	Non-CPP
EVGRALANL	Non-CPP
SRRRQGWLK	Non-CPP
EVRNFLISN	Non-CPP
SIGDSHIGI	Non-CPP
VKPQIHENF	Non-CPP
LLFTRLAKL	Non-CPP
WADENGDLG	Non-CPP
KERHPRITS	Non-CPP
PNGVQEETS	Non-CPP
AHFDLNFLN	Non-CPP
SRLSELSKV	Non-CPP
SPDIDKKIN	Non-CPP
RVRDQIMLS	Non-CPP
TDVTGIIQL	Non-CPP
RVAANVLPT	Non-CPP
GRFQSPGTQ	Non-CPP
GKGVKIIGG	Non-CPP
LLRVEVDIG	Non-CPP
DEWADENGD	Non-CPP
VPYLTGQGI	Non-CPP
RFVGAPSRE	Non-CPP
VQKTSEMNT	Non-CPP
LRQYQGLCG	Non-CPP
VEHISGNQI	Non-CPP
YDCCSGSCS	Non-CPP
GVQALSIAN	Non-CPP
TSGEFLRVA	Non-CPP
ICNMACRLE	Non-CPP
PSGAEKPYI	Non-CPP
PDCQFSKLC	Non-CPP
IYLDSAATT	Non-CPP
RGASLKGLF	Non-CPP
QDLSRRDFT	Non-CPP
RSKRTLGLG	Non-CPP
VLENHQVKK	Non-CPP
DALGALRLK	Non-CPP
VSNSDFVTM	Non-CPP
VLGGTALPQ	Non-CPP
ADVVKSKGQ	Non-CPP
TVRIGAENP	Non-CPP
FADGKVVYT	Non-CPP
LMALEHKVL	Non-CPP
LDLTFNRRI	Non-CPP
NQIAICSWW	Non-CPP
VGGRFQSPG	Non-CPP
GPITWVCGG	Non-CPP
IINFLMYMT	Non-CPP
GLLKGISAL	Non-CPP
EGDTTDNEY	Non-CPP
LELLNTITC	Non-CPP
NPFHQFSVF	Non-CPP
TVDWAKATT	Non-CPP
AMPKFPFRH	Non-CPP
VAVETSEYL	Non-CPP
IQPKLLGKA	Non-CPP
GKSFIGSLE	Non-CPP
YEGRCYKVF	Non-CPP
DEIEARMQQ	Non-CPP
DRIVSQLLA	Non-CPP
KYTHRSCNK	Non-CPP
QSRKPPNPT	Non-CPP
LLATVSGYF	Non-CPP
LFWWMESWE	Non-CPP
APPPPAPCF	Non-CPP
AQMDGAILV	Non-CPP
SACWPCCWG	Non-CPP
VANVLVVLA	Non-CPP
KAKRIIDAA	Non-CPP
PNGCPRRRG	Non-CPP
HISKYHFRD	Non-CPP
WTLYSAGYL	Non-CPP
PQHLCGSHL	Non-CPP
HLYPFCNCD	Non-CPP
MGMRLPNII	Non-CPP
AGGLVTGIQ	Non-CPP
ERHAEGTFT	Non-CPP
TFKAKDLIV	Non-CPP
AMQYDQTTT	Non-CPP
LSSHLPKLF	Non-CPP
NLSAGYLLG	Non-CPP
GMPSWRDWF	Non-CPP
QLPLDVYDL	Non-CPP
FDMVAYVSE	Non-CPP
EGVEMVMPG	Non-CPP
LAELPRLLA	Non-CPP
KAAGKAALG	Non-CPP
HFGPLTWVC	Non-CPP
AEDDLVDSC	Non-CPP
FGHLFKLAT	Non-CPP
RAGIPEAFV	Non-CPP
IKISYEKEV	Non-CPP
PKRELEHWC	Non-CPP
NGSCDECYG	Non-CPP
LIGLDMSRA	Non-CPP
IKHGDFCDG	Non-CPP
SSLSTQQTT	Non-CPP
CGSHLVDAL	Non-CPP
CKIWFQNRR	Non-CPP
KKDMHKVET	Non-CPP
EVLHGKKFL	Non-CPP
QGTTNIVCE	Non-CPP
GNRDYPAIE	Non-CPP
TSDISSYLE	Non-CPP
RPVYIPQPR	Non-CPP
RSLDASPSS	Non-CPP
CGLCRYRCC	Non-CPP
ARVDFSLAG	Non-CPP
GKNVKPQIH	Non-CPP
PEVLPDTSP	Non-CPP
LSGGVLSQT	Non-CPP
PAGGGTVLN	Non-CPP
RDECCSNPA	Non-CPP
SPDSMYYGH	Non-CPP
VVMMITGRS	Non-CPP
LTPSLEWTK	Non-CPP
IPEAFVSLG	Non-CPP
MQKLQISVY	Non-CPP
FLSGIGQQG	Non-CPP
PGGPQPRPP	Non-CPP
QVLEEVSRL	Non-CPP
KDSNLIGQF	Non-CPP
QKDPYIYLD	Non-CPP
ICSLYQENY	Non-CPP
NQKTWKAAE	Non-CPP
MWITNGGVA	Non-CPP
RVVLENHQV	Non-CPP
LLKNILADV	Non-CPP
TGMGADGRE	Non-CPP
IVILGLDCA	Non-CPP
RAGQRVRDA	Non-CPP
ESTENVPRT	Non-CPP
GPTLQCPPP	Non-CPP
GALLSRNSP	Non-CPP
TDNASRDGF	Non-CPP
LEPEDLLKF	Non-CPP
NASGETVES	Non-CPP
FCCKCCKNS	Non-CPP
LGLLKGISA	Non-CPP
IVLGLDARD	Non-CPP
QIKIWFLNR	Non-CPP
SLDGEKYFQ	Non-CPP
FDHNLKLIK	Non-CPP
PDWFHYEGH	Non-CPP
KLCGRKLPE	Non-CPP
DPIRRRNFV	Non-CPP
NHNRIESIL	Non-CPP
CKSKVCYKN	Non-CPP
STLSSNGIL	Non-CPP
PDISSEMMI	Non-CPP
KENKCNGTD	Non-CPP
ELLWRDGQV	Non-CPP
ALFSFVLPD	Non-CPP
PAIHPVLSG	Non-CPP
LEEYYDPMY	Non-CPP
KAMQASIES	Non-CPP
VKVDKVNIM	Non-CPP
KKPLVICST	Non-CPP
RPNICQVLE	Non-CPP
PMEPEKIPD	Non-CPP
IERNITEIV	Non-CPP
LKTFANFPS	Non-CPP
LAKNLATLY	Non-CPP
PQVVYKMKL	Non-CPP
ECVMCGLGI	Non-CPP
RDVGVVDAR	Non-CPP
CCPPAYCEA	Non-CPP
HEYKRQLLN	Non-CPP
ALRCQENYL	Non-CPP
ELPRLLAEQ	Non-CPP
IEASGWGAE	Non-CPP
FFLCCTSLG	Non-CPP
SNLVPLWDS	Non-CPP
AIEWEGIES	Non-CPP
SSLTELFAP	Non-CPP
KKDPDTTPK	Non-CPP
RVDLGDCIG	Non-CPP
IDNEKNGVN	Non-CPP
SATHDDDAL	Non-CPP
SPVLTKRLL	Non-CPP
LFLAAIKLW	Non-CPP
IKYWAFMFP	Non-CPP
KALLIKQNL	Non-CPP
QRDYEAGAG	Non-CPP
CIRNCIHKI	Non-CPP
ITLLKHITL	Non-CPP
PLKVEGVEV	Non-CPP
AWTKTLEAS	Non-CPP
LQKYTHRSC	Non-CPP
WTPQAMLYL	Non-CPP
KGKSKRVGR	Non-CPP
YRDRLQVFS	Non-CPP
IAAALPHVI	Non-CPP
IGKFLKKAK	Non-CPP
PGIGGAVWS	Non-CPP
TVLKDLKPE	Non-CPP
RRISATAED	Non-CPP
TKLMTWKTQ	Non-CPP
AKCSKLMYD	Non-CPP
IHYVFLWHI	Non-CPP
LVNDSNGYH	Non-CPP
ITLLTTSGS	Non-CPP
NKCTVDWAK	Non-CPP
STGFSDEDL	Non-CPP
CSGSCSGTV	Non-CPP
KFLPSIVCA	Non-CPP
ASIEWAWRT	Non-CPP
TKKYDNKTL	Non-CPP
EILYIIRPN	Non-CPP
LSGGVDSST	Non-CPP
PSRRGPSLG	Non-CPP
DALLEQPPV	Non-CPP
KRNPFHQFS	Non-CPP
YSYSFPDIS	Non-CPP
QTIKEKLKE	Non-CPP
GSDRVSNSD	Non-CPP
GNPLEHHPT	Non-CPP
LEGFTLGVK	Non-CPP
IYDLPFHSI	Non-CPP
RHWHNWFVG	Non-CPP
LSKVQISEL	Non-CPP
VAGPVDLNE	Non-CPP
SLLDVLFSM	Non-CPP
AEKASRGDQ	Non-CPP
EPGVGCAGR	Non-CPP
SELQLERVN	Non-CPP
AQEITHIDF	Non-CPP
ESPGHPGQP	Non-CPP
ILVHSAWAK	Non-CPP
GRLPDAVIA	Non-CPP
RMPDEDSKI	Non-CPP
LLHSSQLPL	Non-CPP
MGMTYVLAL	Non-CPP
GTSNVHLAR	Non-CPP
LEKAERIGD	Non-CPP
WAVQMTDFM	Non-CPP
AKATGAKIV	Non-CPP
KNVAVTLID	Non-CPP
APLAHLSLT	Non-CPP
ALTSLISSL	Non-CPP
LRTLLELAR	Non-CPP
PLAFSPDML	Non-CPP
SAITSLLGK	Non-CPP
SALRAIGAS	Non-CPP
DILKLFQED	Non-CPP
IHPVLSGLS	Non-CPP
MCGLGIICK	Non-CPP
GKSTLLGMI	Non-CPP
AVIRVAANV	Non-CPP
QAEEVSFKY	Non-CPP
AKYEILYII	Non-CPP
RVAGRVMLK	Non-CPP
SLTELFAPN	Non-CPP
LYSVCRHRG	Non-CPP
PIDTTPVWM	Non-CPP
GKFLKKAKK	Non-CPP
SPLVEKQSV	Non-CPP
ADFVTTDSG	Non-CPP
VDFSLAGAL	Non-CPP
FKSLHYYYV	Non-CPP
LQDKVDSLD	Non-CPP
QVFFLNYYI	Non-CPP
IVGLSGGVD	Non-CPP
VKNNRCQQA	Non-CPP
GHELCRPEA	Non-CPP
ECVSEYISF	Non-CPP
VKLSSEFWY	Non-CPP
STKLRVPYR	Non-CPP
QLDLKPLGT	Non-CPP
KLEYEKGEK	Non-CPP
GAAANAVRL	Non-CPP
VKTLLEKLT	Non-CPP
QSFDRAMDQ	Non-CPP
YYDPMYRYQ	Non-CPP
CCSDPRCRY	Non-CPP
EALEASPVE	Non-CPP
NAYQSYKYP	Non-CPP
IVNVNIPTS	Non-CPP
AAGRAALNA	Non-CPP
TKGEVREAV	Non-CPP
EWRPDFKSK	Non-CPP
SSRKRRADT	Non-CPP
QQTTALPTW	Non-CPP
LDILEALFA	Non-CPP
SECLKHIGD	Non-CPP
FSDEMMSHS	Non-CPP
RDGQVVLQS	Non-CPP
CTRLMYDCC	Non-CPP
EDKKHKIGS	Non-CPP
IHLAAPALA	Non-CPP
EIEIIKLLA	Non-CPP
DLIKKAVDF	Non-CPP
AHCIIALWM	Non-CPP
VAANVLPTA	Non-CPP
RSFIVPFSN	Non-CPP
DLGHKVEKL	Non-CPP
TRLMYDCCH	Non-CPP
GFFDRIKAL	Non-CPP
LGKETPHDY	Non-CPP
ADINKEEEF	Non-CPP
GQRIVLGLD	Non-CPP
LLMSFLITQ	Non-CPP
TGRAKEFGT	Non-CPP
AFLSETETL	Non-CPP
GVHSHINHL	Non-CPP
LIRLMLMEA	Non-CPP
THIPNAWQE	Non-CPP
DISRAGKNV	Non-CPP
SPCSSPVLT	Non-CPP
LADTQSGHR	Non-CPP
GSFACRFGC	Non-CPP
KAVDFFKGL	Non-CPP
YIKVLRCRV	Non-CPP
TATCVRVPV	Non-CPP
RGESIIVES	Non-CPP
YSRKEGQRQ	Non-CPP
KNKPFESGV	Non-CPP
DLLSKESGK	Non-CPP
HRVLDNSTK	Non-CPP
KVILGHHPD	Non-CPP
FRGKFHSQS	Non-CPP
GSKEVVGTF	Non-CPP
SFIVPFSNL	Non-CPP
CASQIGRST	Non-CPP
MAAAAGRAA	Non-CPP
TVNCAIMAG	Non-CPP
VAFLASVVD	Non-CPP
DHRVLDNST	Non-CPP
GLDPDMNPK	Non-CPP
NSVMQVPRV	Non-CPP
TGELPNGDQ	Non-CPP
PQSLLDVLF	Non-CPP
HEAVRVSWA	Non-CPP
IHLTLKVVK	Non-CPP
ALGMDELEG	Non-CPP
GEINGSCDE	Non-CPP
AMGRLGLRP	Non-CPP
KLVEQKTPE	Non-CPP
GGVEIAQTI	Non-CPP
SNALFWMRY	Non-CPP
IPSLIGGLV	Non-CPP
IDQVFSHIK	Non-CPP
SVGTKPRPR	Non-CPP
WTRLSIRRY	Non-CPP
NENLLRFFV	Non-CPP
GCKNFFWKT	Non-CPP
ERVFAAEAL	Non-CPP
KRCCDEEEC	Non-CPP
LATKIIPSL	Non-CPP
LVTSGKSVS	Non-CPP
ELTLEGIKQ	Non-CPP
STAWGAVSG	Non-CPP
ACVTPESFV	Non-CPP
VSIDAHAEE	Non-CPP
GMLFKFLAK	Non-CPP
CLTINTTIC	Non-CPP
PEGHELCRP	Non-CPP
GVVTDLLKT	Non-CPP
LVTNIMEKV	Non-CPP
AEECFFERV	Non-CPP
TMAAKEGGL	Non-CPP
FLPVLARLA	Non-CPP
IFTHEELQK	Non-CPP
KRVGRYTGM	Non-CPP
FCILEVKPQ	Non-CPP
ETIQSIYAS	Non-CPP
HCQRTQSQP	Non-CPP
VWECLEEVV	Non-CPP
AGKNVFRNV	Non-CPP
VTVRIGAEN	Non-CPP
RRYNATHIK	Non-CPP
GRALGGLLA	Non-CPP
LLQGTCDSH	Non-CPP
GLRRRKRPL	Non-CPP
FPFRHTELF	Non-CPP
DDLGHKVEK	Non-CPP
SSTAAAILH	Non-CPP
RQCKIWFQN	Non-CPP
QDALIKIAI	Non-CPP
SSSSNVTEA	Non-CPP
PLAISAISA	Non-CPP
QVLSSMKEN	Non-CPP
NVIGNGVVV	Non-CPP
IASGIGTFL	Non-CPP
ASFLCAEVV	Non-CPP
MNKIIVGLS	Non-CPP
LGHKVEKLL	Non-CPP
PSCPWGSSS	Non-CPP
IVLVGVSRT	Non-CPP
AARLDAKSI	Non-CPP
WALLGTTFG	Non-CPP
VQPTFLLEH	Non-CPP
RKNSRDRNS	Non-CPP
AQLDILEAL	Non-CPP
ILGLDCAGK	Non-CPP
NLSNAAAIQ	Non-CPP
LSRRDFTAA	Non-CPP
VLETLDKGE	Non-CPP
CRIGPITWV	Non-CPP
KIWFLNRRM	Non-CPP
STVNEEHQN	Non-CPP
PDAVIACVG	Non-CPP
NYVSADEAS	Non-CPP
FPFFPPGIC	Non-CPP
NRYPECQPS	Non-CPP
DKEKKPVCT	Non-CPP
DLKPETEYV	Non-CPP
SLDRCYSTQ	Non-CPP
FGLRKHRKH	Non-CPP
KEGNSKINF	Non-CPP
FKRFMHMSE	Non-CPP
LLYLHHAKW	Non-CPP
ESQKKDNVY	Non-CPP
GFGTHGCPL	Non-CPP
YPNGVQEET	Non-CPP
TLKKFAKAG	Non-CPP
NGERPEVLP	Non-CPP
RREQEQRRE	Non-CPP
VFPPWMCKS	Non-CPP
IHHNTWLHF	Non-CPP
CTARRPRIP	Non-CPP
QATSPEPGK	Non-CPP
HETGSNNPS	Non-CPP
QRPNICQVL	Non-CPP
ELVAQFNTI	Non-CPP
IEAIENGVP	Non-CPP
PACGGFWIS	Non-CPP
PQGRLTLSR	Non-CPP
ESAEDGPTT	Non-CPP
QHILMTSAP	Non-CPP
KVDEDLQGA	Non-CPP
KAALGAVAD	Non-CPP
YVLKFQILK	Non-CPP
EDFNNEVNM	Non-CPP
CYRVFDEPK	Non-CPP
DRLITGRLQ	Non-CPP
CQFSKLCGG	Non-CPP
CAKEVMGPL	Non-CPP
LTLTAGLGG	Non-CPP
LTVYSIWMS	Non-CPP
IVAEDDEGL	Non-CPP
AALRRLSQR	Non-CPP
KRIDDGHRL	Non-CPP
KSTLLGMIA	Non-CPP
NGTDAKVKL	Non-CPP
VLEGENAVA	Non-CPP
GIHPGLCCS	Non-CPP
[truncated: 19,574 more rows]
